# Supplementary material for: Multi-organelle imaging with dye combinations: targeting the ER, mitochondria, and plasma membrane
Source: Royal Society of Chemistry journal article supplement (doi:10.1039/d4tb02456g), 2024-12-30
Supplement: d4tb02456g1.pdf [file d4tb02456g1.pdf]

## Multi-Organelle Imaging with Dye Combinations: Targeting the ER, Mitochondria, and Plasma Membrane

Yogesh Dubey and Sriram Kanvah\*

<sup>a</sup>Department of Chemistry, Indian Institute of Technology Gandhinagar, Palaj, Gandhinagar

e-mail: [sriram@iitgn.ac.in](mailto:sriram@iitgn.ac.in)

### Table of Contents

|            |                                                                                                       |
|------------|-------------------------------------------------------------------------------------------------------|
| Figure S1  | Reported fluorophores for Multi-organelle imaging                                                     |
| S2         | Synthetic Procedure                                                                                   |
| Figure S3  | Absorption spectral data for <b>C1</b> , <b>C2</b> , <b>D1</b> , <b>P1</b> and <b>P2</b>              |
| Figure S4  | Emission spectral data for <b>C1</b> , <b>C2</b> , <b>D1</b> , <b>P1</b> and <b>P2</b>                |
| Table S1   | Molar extinction coefficient for <b>C1</b> , <b>C2</b> , <b>D1</b> , <b>P1</b> and <b>P2</b>          |
| Table S2   | Quantum yield for <b>C1</b> , <b>C2</b> , <b>P1</b> and <b>P2</b>                                     |
| Figure S5  | Spectral overlap between <b>C1/C2</b> emission and the <b>P2</b> excitation                           |
| Figure S6  | Lifetime Decay for <b>C1</b> , <b>C2</b> and <b>C1+P2</b>                                             |
| Figure S7  | MTT Assay for <b>C1</b> , <b>C2</b> , <b>D1</b> , <b>P1</b> and <b>P2</b>                             |
| Figure S8  | Preliminary Imaging for <b>C2</b> , <b>D1</b> and <b>P2</b> in COS-7                                  |
| Figure S9  | Preliminary Imaging for <b>C1</b> , <b>C2</b> and <b>D1</b> in HeLa                                   |
| Figure S10 | Preliminary Imaging for <b>C1</b> , <b>C2</b> and <b>P2</b> in A549                                   |
| Figure S11 | Colocalization for <b>C2</b> , <b>D1</b> and <b>P2</b> in COS-7                                       |
| Figure S12 | Colocalization for <b>C1</b> , <b>C2</b> and <b>D1</b> in HeLa                                        |
| Figure S13 | Colocalization for <b>C1</b> and <b>C2</b> in A549                                                    |
| Figure S14 | Visualization of rough and smooth endoplasmic reticulum using <b>C1</b> , <b>C2</b> , and <b>D1</b>   |
| Figure S15 | Compatibility with trypsinization <b>C1</b> , <b>C2</b> , <b>D1</b> , <b>P1</b> and <b>P2</b> in HeLa |
| Figure S16 | Standardized condition for multi-organelle imaging (HeLa and A549)                                    |
| Figure S17 | No Spectral Spillover experiment (A549)                                                               |
| Figure S18 | Triple Imaging using <b>C1/C2</b> and <b>P2</b> in HeLa                                               |
| Figure S19 | Dual Imaging using <b>C2</b> and <b>P2</b> in A549                                                    |
| Figure S20 | 3D Projection                                                                                         |
| Figure S21 | Response to pH                                                                                        |
| Figure S22 | Response to different analyte                                                                         |
| S23        | Characterization Data                                                                                 |
|            | References                                                                                            |

**Figure S1.** A few examples of reported fluorophores for multi-organelle imaging

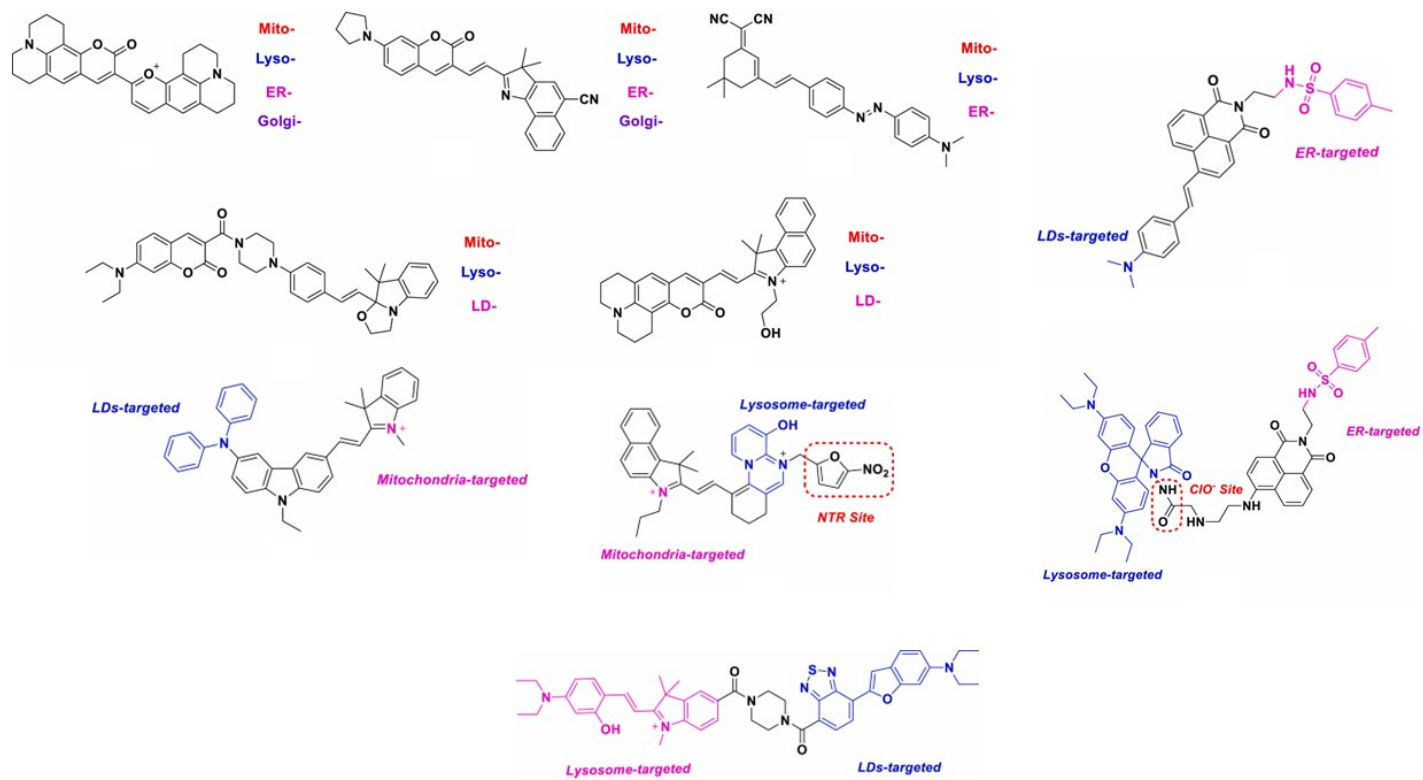

## S2. Synthetic procedures

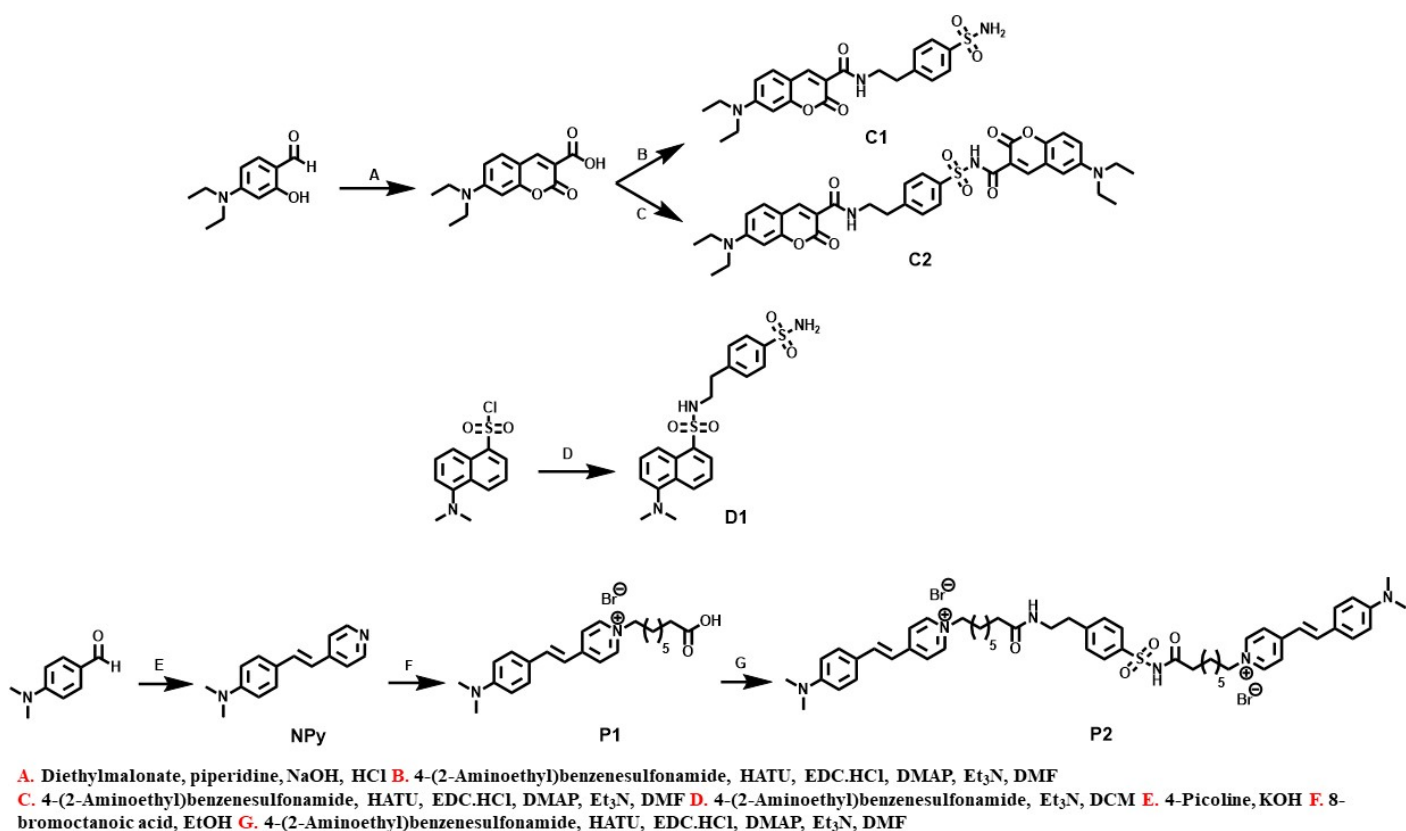

### 7-(diethylamino)-2-oxo-2H-chromene-3-carboxylic acid (Route A)<sup>1</sup>

In a round bottom flask equipped with magnetic bead, 4-(Diethylamino)-2-hydroxybenzaldehyde (1 equiv) was dissolved in ethanol (0.1 M), followed by the addition of diethyl malonate (1 equiv) and piperidine (2 equiv). The reaction mixture was refluxed for 16 h, then quenched with 3N HCl and extracted with brine and dichloromethane. The organic layer was dried over anhydrous sodium sulfate and concentrated using rotary evaporator. The resulting crude product was dissolved in ethanol (0.1 M), and 12N NaOH was added dropwise. The reaction was refluxed for 24 h and subsequently quenched with 12N HCl on ice. The resulting orange precipitate was filtered, washed with water, and purified by silica gel column chromatography using 60% ethyl acetate in hexanes, yielding the pure product as a yellow solid in 75% yield.

### 7-(diethylamino)-2-oxo-N-(4-sulfamoylphenethyl)-2H-chromene-3-carboxamide (C1) (Route B)

In a round-bottom flask equipped with a magnetic stir bar, Cou-COOH (1 equiv), 4-(2-aminoethyl)benzenesulfonamide (1 equiv), HATU (1.1 equiv), EDC·HCl (1.1 equiv), and DMAP (1 equiv) were added and purged with argon gas to ensure an inert atmosphere. Under this atmosphere, dry DMF (0.1 M) was added to dissolve the reagents, followed by the addition of triethylamine (2 equiv) at 0 °C. The reaction mixture was stirred at room temperature for 24 h. Completion of the reaction was confirmed by TLC using 1% MeOH in methylene chloride (DCM). The crude product was concentrated using rotary evaporator and purified by silica gel column chromatography with a gradient elution from 1% to 10% methanol in methylene chloride, yielding the pure product as a bright yellow solid in 45% yield.

### **7-(diethylamino)-N-(4-(N-(6-(diethylamino)-2-oxo-2H-chromene-3-carbonyl)sulfamoyl)phenethyl)-2-oxo-2H-chromene-3-carboxamide (C2) (Route C)**

Following the general procedure from Samantha et. al with slight modifications.<sup>2</sup> In a round-bottom flask equipped with a magnetic stir bar, 4-(2-aminoethyl)benzenesulfonamide (1 equiv), Cou-COOH (2.2 equiv), HATU (1.5 equiv), EDC·HCl (1.5 equiv), and DMAP (1 equiv) were added and purged with argon gas to ensure an inert atmosphere. Under this atmosphere, dry DMF (0.1 M) was added to dissolve the reagents, followed by the addition of triethylamine (5 equiv) at 0 °C. The reaction mixture was stirred at room temperature for 24 h. The completion of the reaction was confirmed by TLC using 2% MeOH in DCM. The crude product was concentrated using rotary evaporator and purified by silica gel column chromatography with a gradient elution from 1% to 10% methanol in DCM, yielding the pure product as a bright yellow solid in 41% yield.

### **5-(dimethylamino)-N-(4-sulfamoylphenethyl)naphthalene-1-sulfonamide (D1) (Route D)**

In a round-bottom flask equipped with a magnetic stir bar, 4-(2-aminoethyl)benzenesulfonamide (1 equiv) and triethylamine (4 equiv) were dissolved in DCM and stirred for 20 minutes. To this solution, 5-(dimethylamino)naphthalene-1-sulfonyl chloride (2 equiv) was added, and the reaction was stirred at room temperature for 12 hours, with progress monitored by TLC. The reaction was allowed to proceed until the starting material was fully consumed. The crude reaction mixture was then concentrated using rotary evaporation and purified by silica gel column chromatography with isocratic elution using 1% methanol in DCM, yielding the pure product as a colorless solid in 91% yield.

**(E)-N,N-dimethyl-4-(2-(pyridin-4-yl)vinyl)aniline (NPy) (Route E)<sup>3</sup>**

In a round-bottom flask equipped with a magnetic stir bar, 4-(dimethylamino)benzaldehyde (1 equiv), 4-picoline (5 equiv), and potassium hydroxide (5 equiv) were heated at 80 °C for 12 h. After the reaction mixture cooled to room temperature, ice-cold water was added. The resulting orange precipitate was filtered, washed with water, and yielded the product with a 22% yield.

**(E)-1-(7-carboxyheptyl)-4-(4-(dimethylamino)styryl)pyridin-1-ium bromide (P1) (Route F)**

In a round-bottom flask equipped with a magnetic stir bar, NPy (1 equiv) and 8-bromooctanoic acid (1.2 equiv) were dissolved in ethanol (0.1 M) and refluxed for 24 hours. The reaction mixture was then completely dried using a rotary evaporator. A minimal amount of dichloromethane (DCM) was added, followed by sonication. The resulting red precipitate was filtered, washed with water, and yielded the product with a 51% yield.

**4-((E)-4-(dimethylamino)styryl)-1-(8-((4-(2-(8-(4-((E)-4-(dimethylamino)styryl)pyridin-1-ium-1-yl)octanamido)ethyl)phenyl)sulfonamido)-8-oxooctyl)pyridin-1-ium bromide (P2) (Route G)**

Following the general procedure from Samantha et. al with slight modifications.<sup>2</sup> In a round-bottom flask equipped with a magnetic stir bar, 4-(2-aminoethyl)benzenesulfonamide (1 equiv), 8C-COOH (2.2 equiv), HATU (1.5 equiv), EDC·HCl (1.5 equiv), and DMAP (1 equiv) were added and purged with argon gas to ensure an inert atmosphere. Under this atmosphere, dry DMF (0.1 M) was added to dissolve the reagents, followed by the addition of triethylamine (5 equiv) at 0 °C. The reaction mixture was stirred at room temperature for 24 hours. Completion of the reaction was confirmed by TLC using 2% MeOH in DCM. The crude product was concentrated using rotary evaporation and purified by silica gel column chromatography with a gradient elution from 1% to 12% methanol in DCM, yielding the pure product as a red solid in 41% yield.

**Figure S3.** Absorption spectral data for C1, C2, D1, P1 and P2 in different solvents at concentration of 20  $\mu\text{M}$

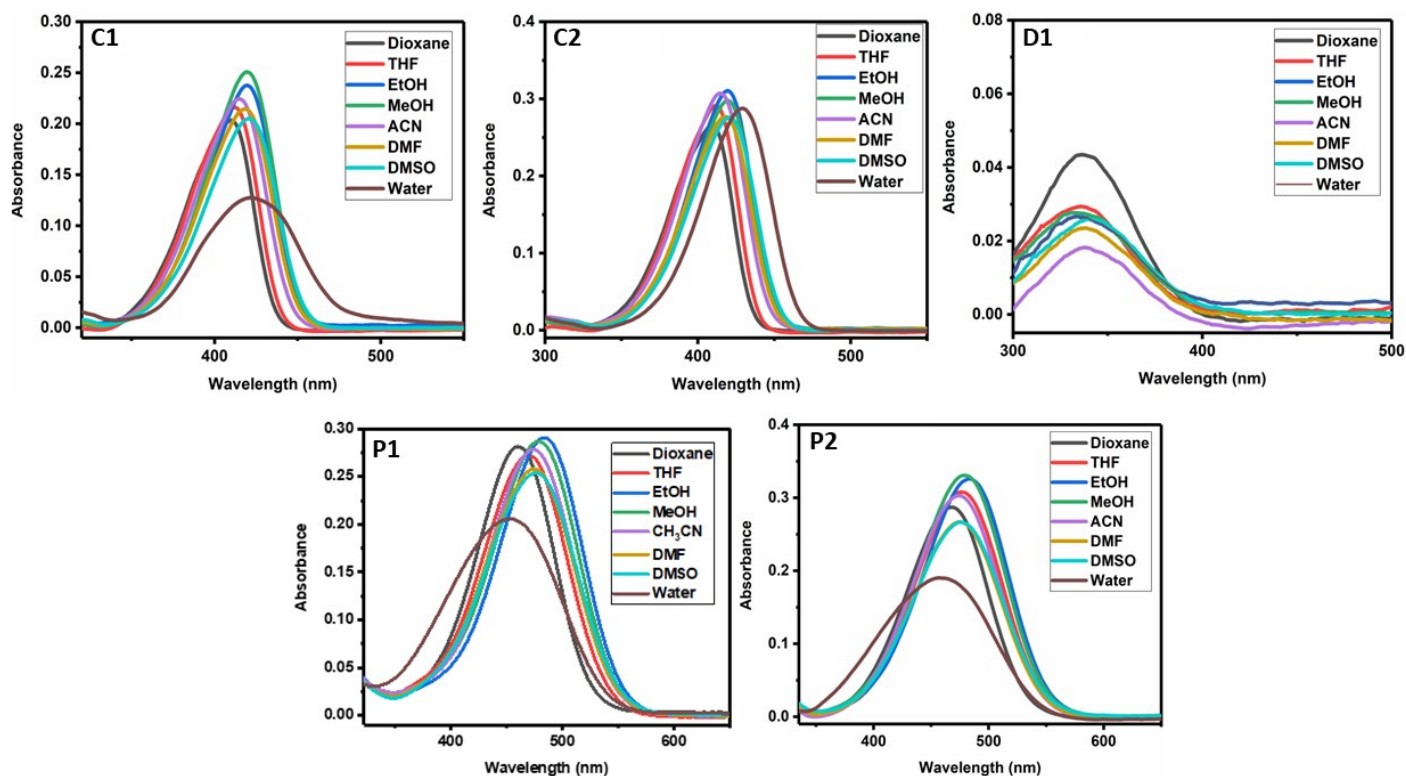

**Figure S4.** Emission spectral data for C1, C2, D1, P1 and P2 in different solvents at concentration of 20  $\mu\text{M}$

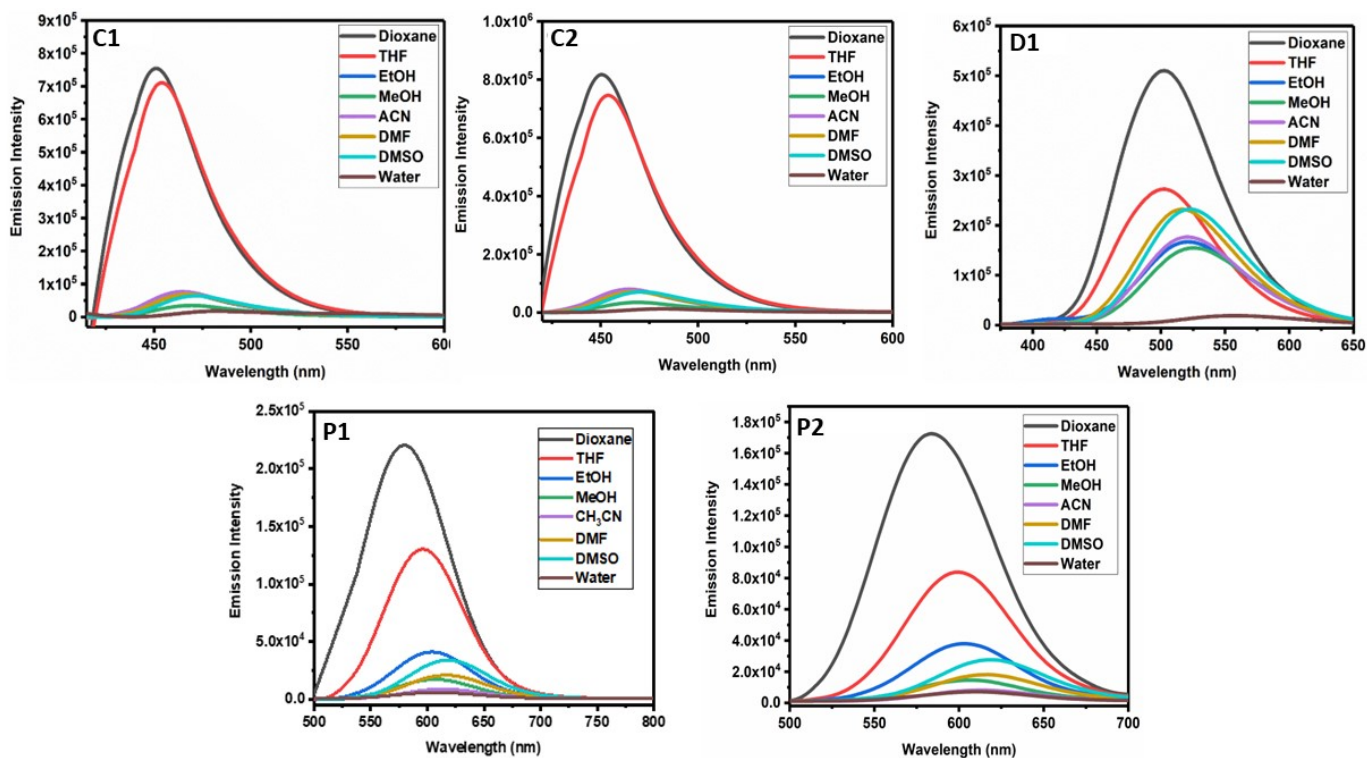

**Table S1.** Molar extinction coefficient [ $\epsilon$  ( $M^{-1}cm^{-1}$ )  $\times 10^3$ ] for **C1**, **C2**, **D1**, **P1** and **P2** in different solvents

| Solvent            | <b>C1</b>  | <b>C2</b>  | <b>D1</b>  | <b>P1</b>  | <b>P2</b>  |
|--------------------|------------|------------|------------|------------|------------|
|                    | $\epsilon$ | $\epsilon$ | $\epsilon$ | $\epsilon$ | $\epsilon$ |
| Dioxane            | 10.2       | 13.3       | 2.2        | 14.1       | 24.8       |
| THF                | 10.8       | 14.6       | 1.5        | 13.7       | 15.4       |
| EtOH               | 11.9       | 15.5       | 1.4        | 14.6       | 16.3       |
| CH <sub>3</sub> OH | 12.6       | 14.9       | 1.4        | 14.3       | 16.5       |
| CH <sub>3</sub> CN | 11.2       | 15.4       | 0.9        | 13.9       | 15.1       |
| DMF                | 10.7       | 13.9       | 1.2        | 12.9       | 13.4       |
| DMSO               | 10.3       | 13.8       | 1.4        | 12.7       | 13.3       |
| H <sub>2</sub> O   | 6.4        | 14.4       | 0.6        | 10.3       | 9.5        |

**Table S2.** Relative quantum yield for **C1**, **C2**, **P1** and **P2** with reference to quinine sulfate

| Molecule  | $\Phi$ (MeOH) %<br>yield |
|-----------|--------------------------|
| <b>C1</b> | 1.24                     |
| <b>C2</b> | 1.21                     |
| <b>P1</b> | 0.51                     |
| <b>P2</b> | 0.58                     |

**Figure S5.** Normalized spectral overlap between **C1/C2**-emission and the **P2**-excitation

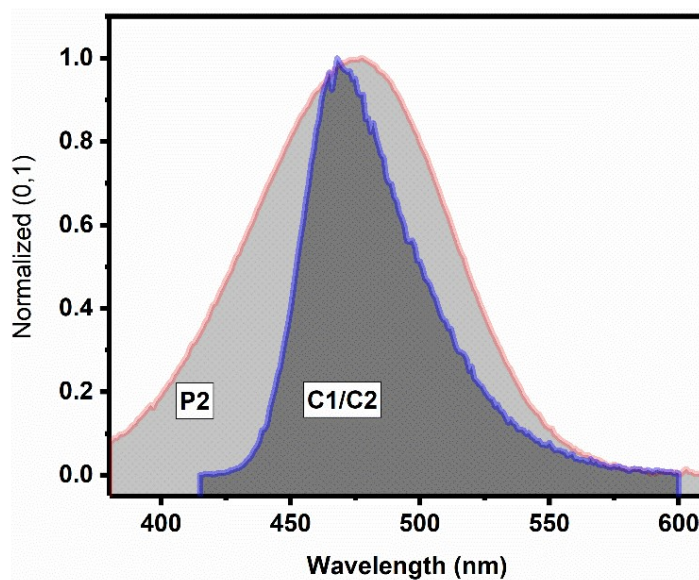



**Figure S6.** Lifetime decay profiles for **C1** (A) and **C2** (B) in various solvents

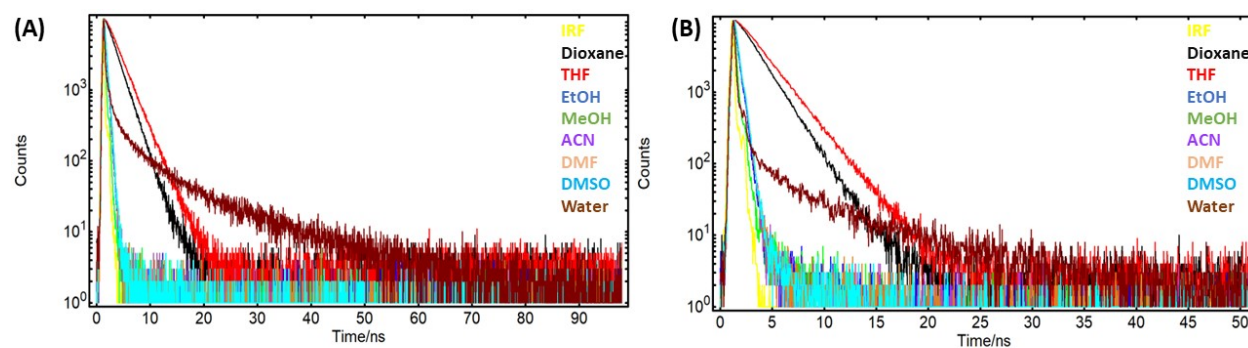

Tabulated lifetime decay data for **C1** and **C2**

| Compound  | Solvent | $\tau_1$ (ns) | $\tau_2$ (ns) | $\tau_3$ (ns) | $\chi^2$ |
|-----------|---------|---------------|---------------|---------------|----------|
| <b>C1</b> | Dioxane | 1.86          | -             | -             | 1.051    |
|           | THF     | 2.30          | -             | -             | 1.038    |
|           | EtOH    | 0.28          | 0.66          | -             | 0.979    |
|           | MeOH    | 0.14          | 0.73          | -             | 1.028    |
|           | ACN     | 0.31          | -             | -             | 1.020    |
|           | DMF     | 0.32          | -             | -             | 1.111    |
|           | DMSO    | 0.34          | 1.74          | -             | 0.948    |
|           | Water   | 0.10          | 1.83          | 11.56         | 1.245    |
| <b>C2</b> | Dioxane | 1.89          | -             | -             | 0.991    |
|           | THF     | 2.35          | -             | -             | 1.056    |
|           | EtOH    | 0.29          | 1.12          | -             | 1.237    |
|           | MeOH    | 0.14          | 1.22          | -             | 1.181    |
|           | ACN     | 0.32          | 1.12          | -             | 1.007    |
|           | DMF     | 0.32          | -             | -             | 1.287    |
|           | DMSO    | 0.31          | 1.21          | -             | 0.991    |
|           | Water   | 0.08          | 1.52          | 8.24          | 1.015    |

Lifetime decay profiles for **C1** (left panel) and **C1+P2** (right panel) in DMSO:

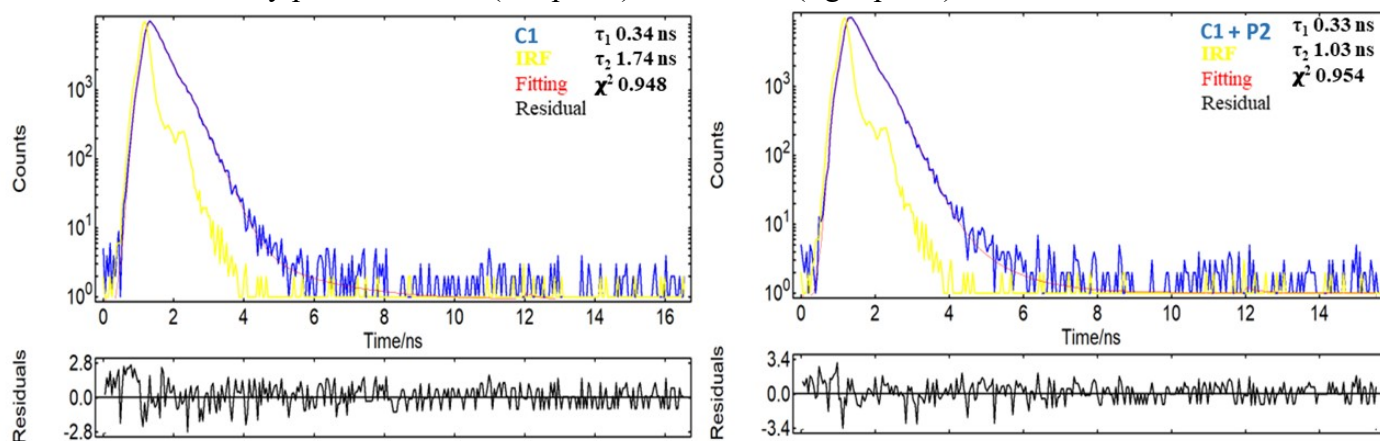



**Figure S7.** MTT Assay for **C1**, **C2**, **D1**, **P1** and **P2** in COS-7, HeLa and A549 cell lines at bioimaging concentration of 1  $\mu$ M

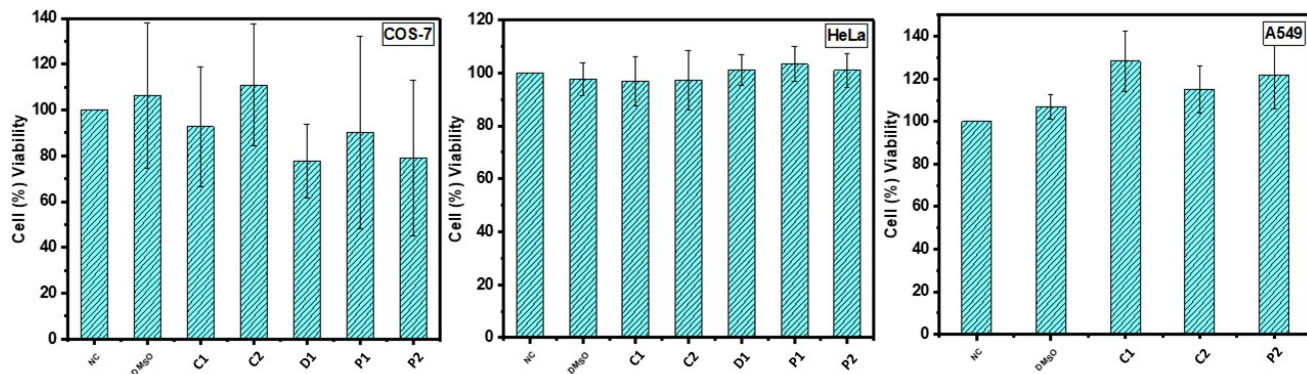

**Figure S8.** Preliminary Imaging for **C2**, **D1** and **P2** in COS-7. Scale bar: 10  $\mu$ m

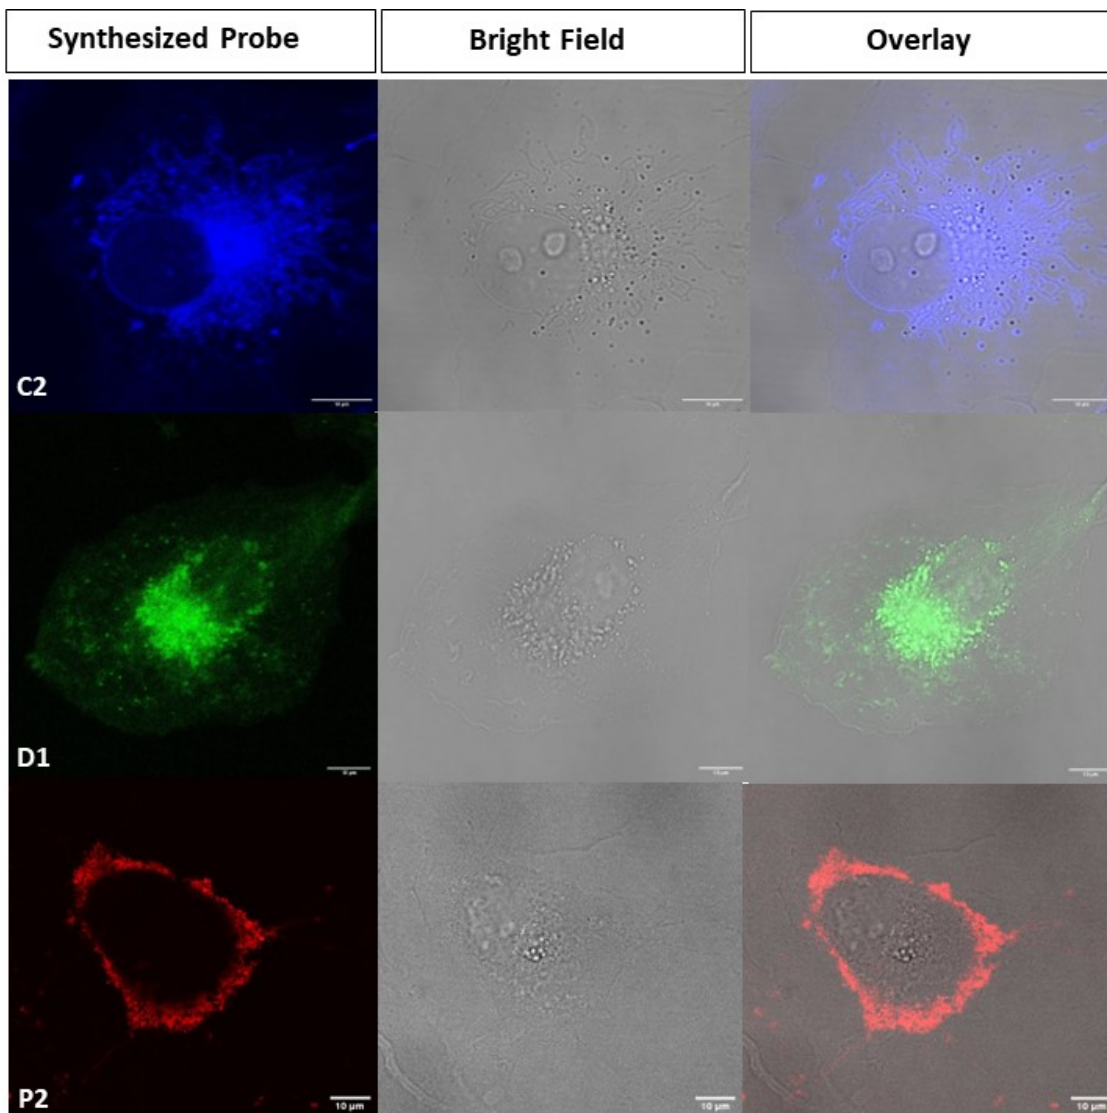

Figure S9. Preliminary Imaging for C1, C2 and D1 in HeLa Cells. Scale bar: 10  $\mu$ m

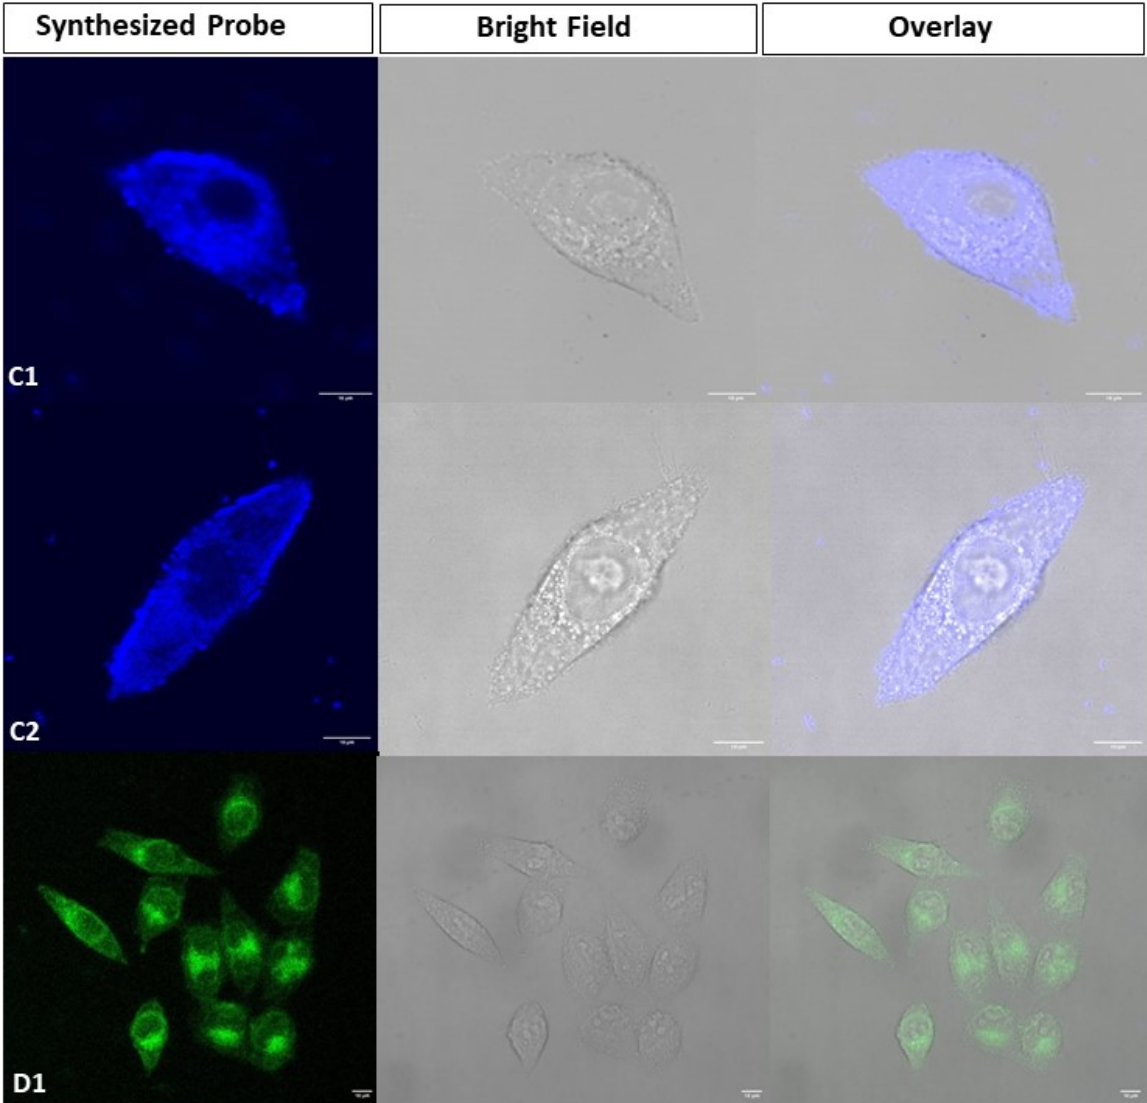

**Figure S10.** Preliminary Imaging for **C1**, **C2** and **P2** (**P2\*** - At saturation of mitochondrial fluorescence) in A549. Scale bar: 10  $\mu$ m

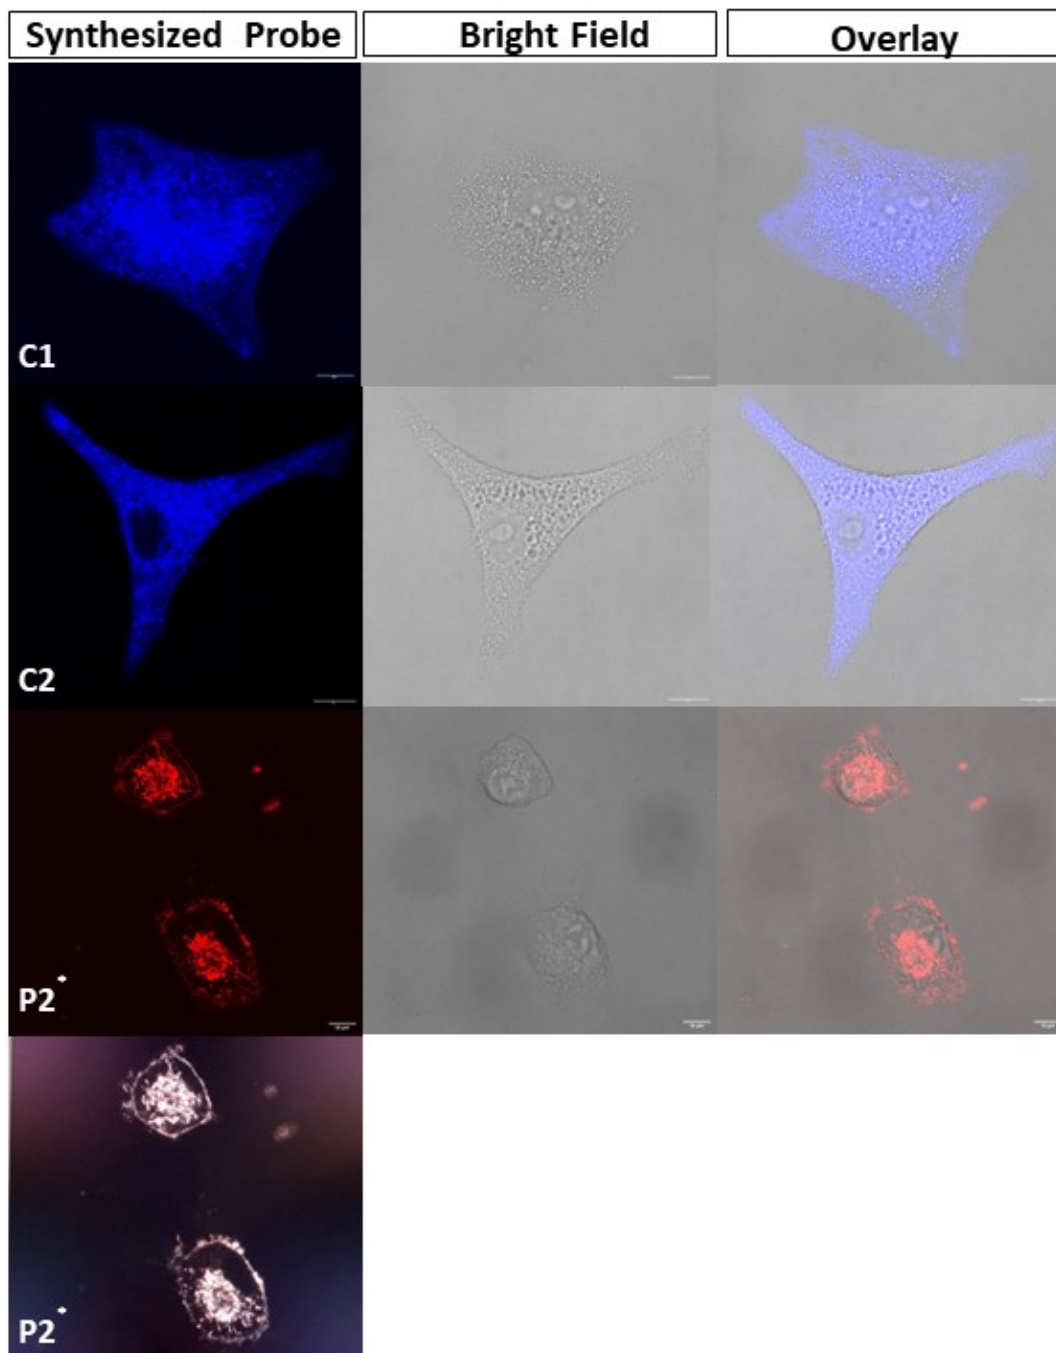

**Figure S11.** Colocalization for **C2**, **D1** and **P2** in COS-7 cells. Scale bar: 10  $\mu\text{m}$

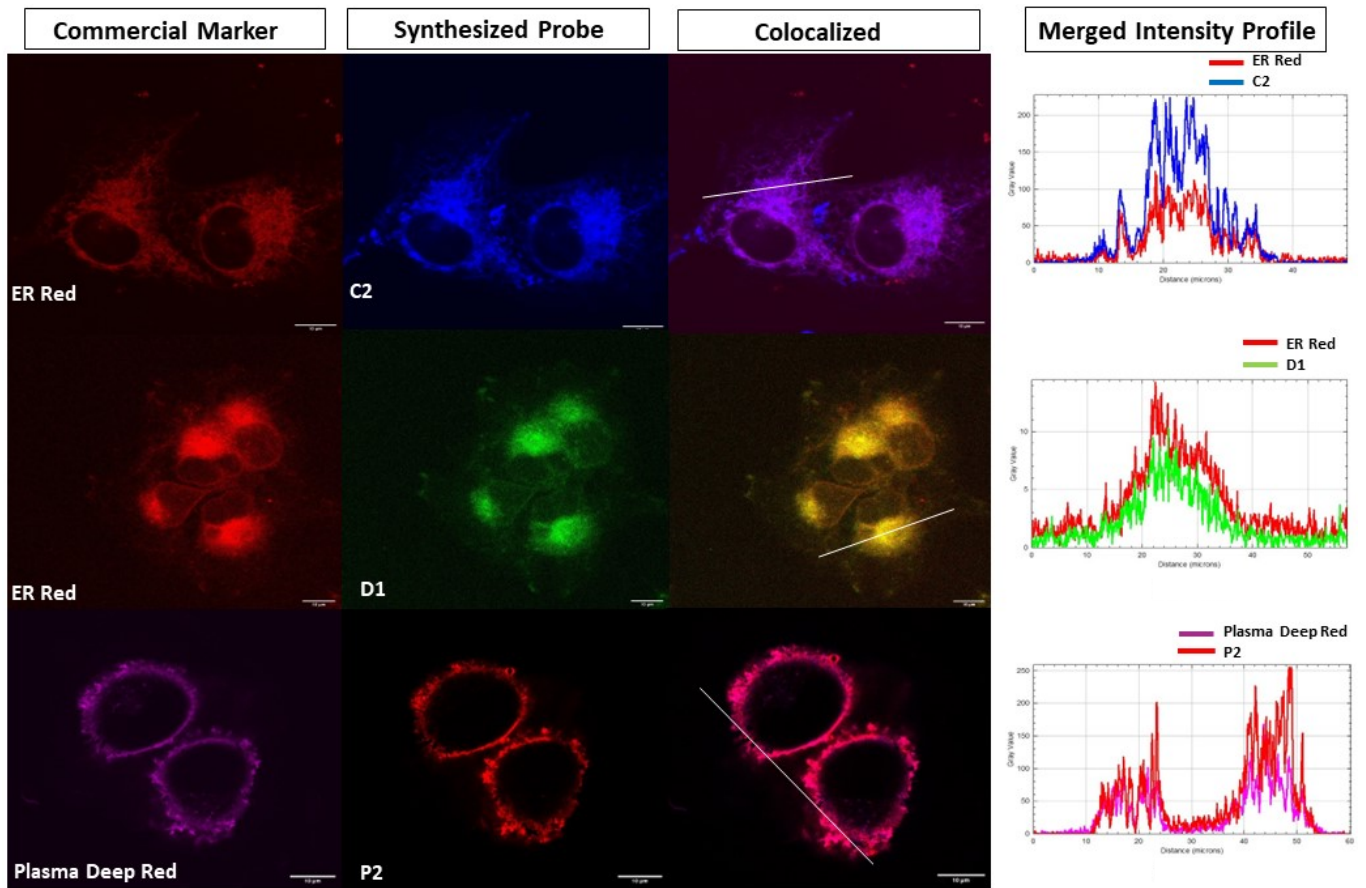



**Figure S12.** Colocalization for **C1**, **C2** and **D1** in HeLa cells. Scale bar: 10  $\mu\text{m}$

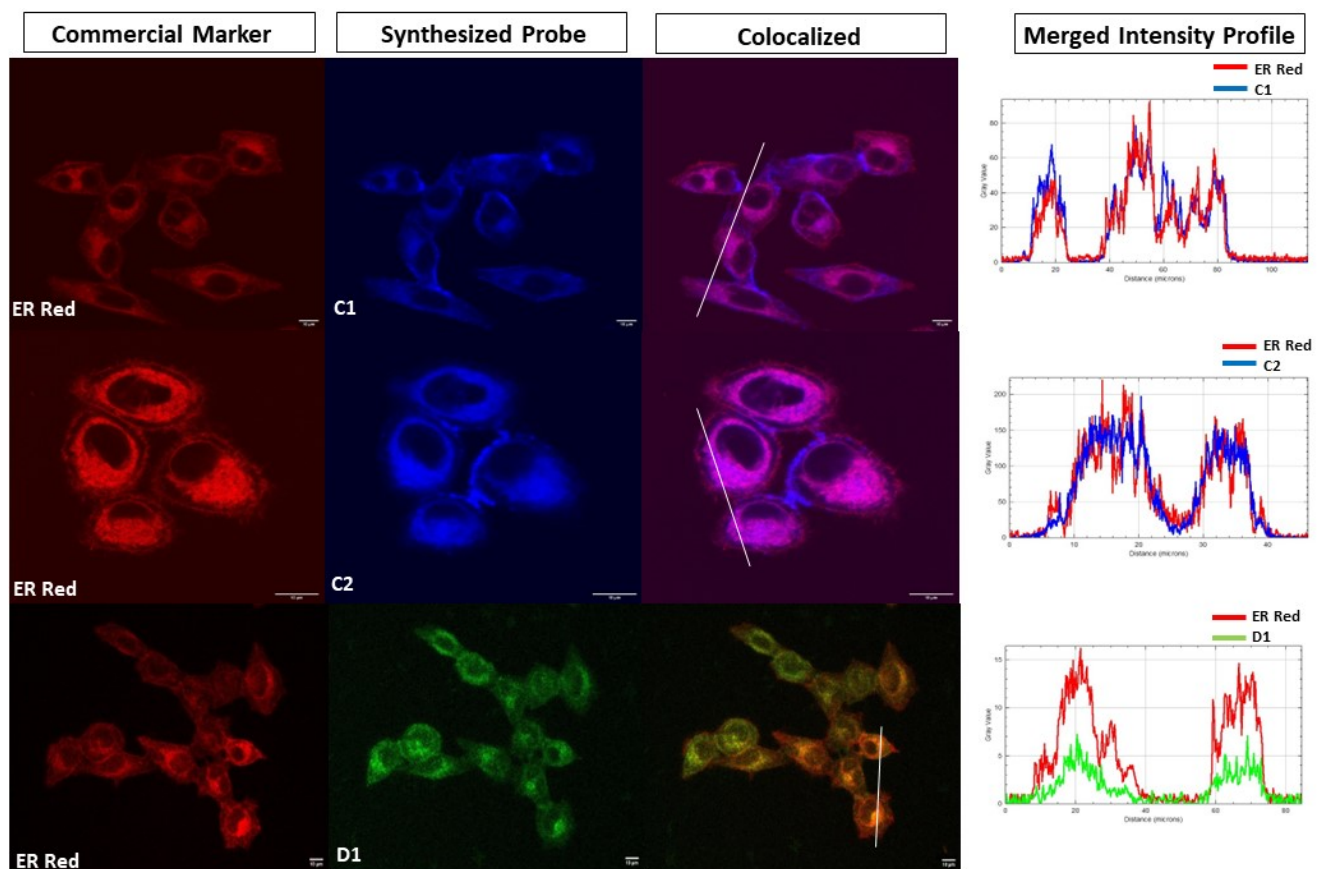

**Figure S13.** Colocalization for C1 and C2 in A549 cells. Scale bar: 10  $\mu\text{m}$

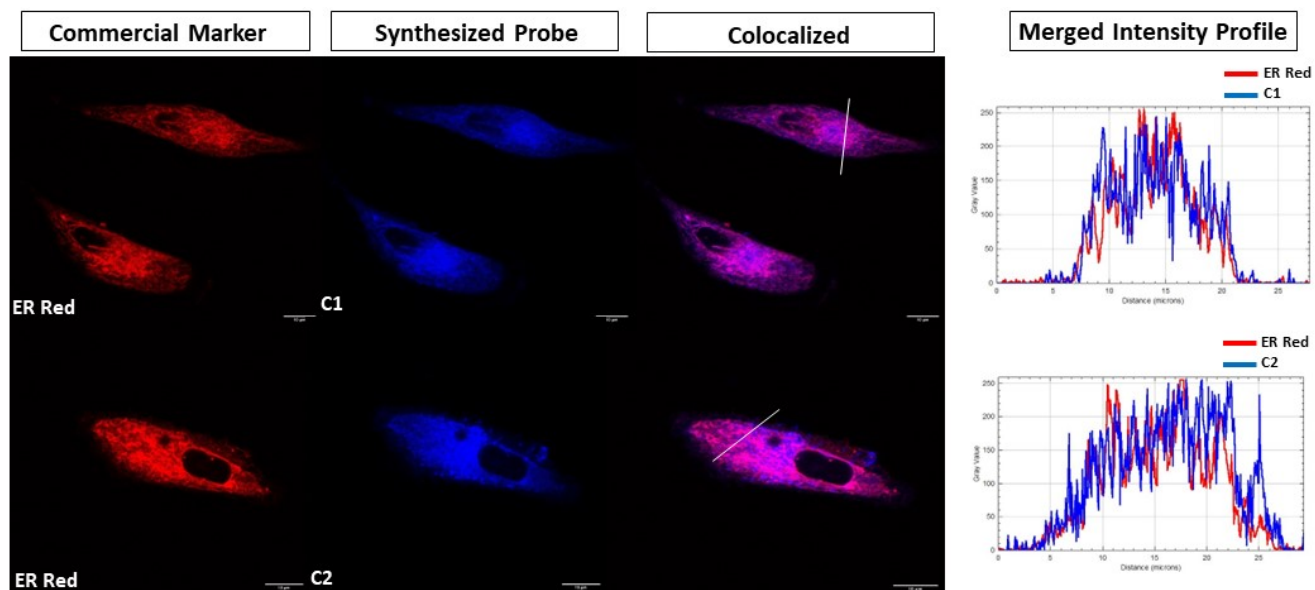

**Figure S14.** Visualization of rough and smooth endoplasmic reticulum using **C1**, **C2**, and **D1** in COS-7. Scale bar: 10  $\mu\text{m}$

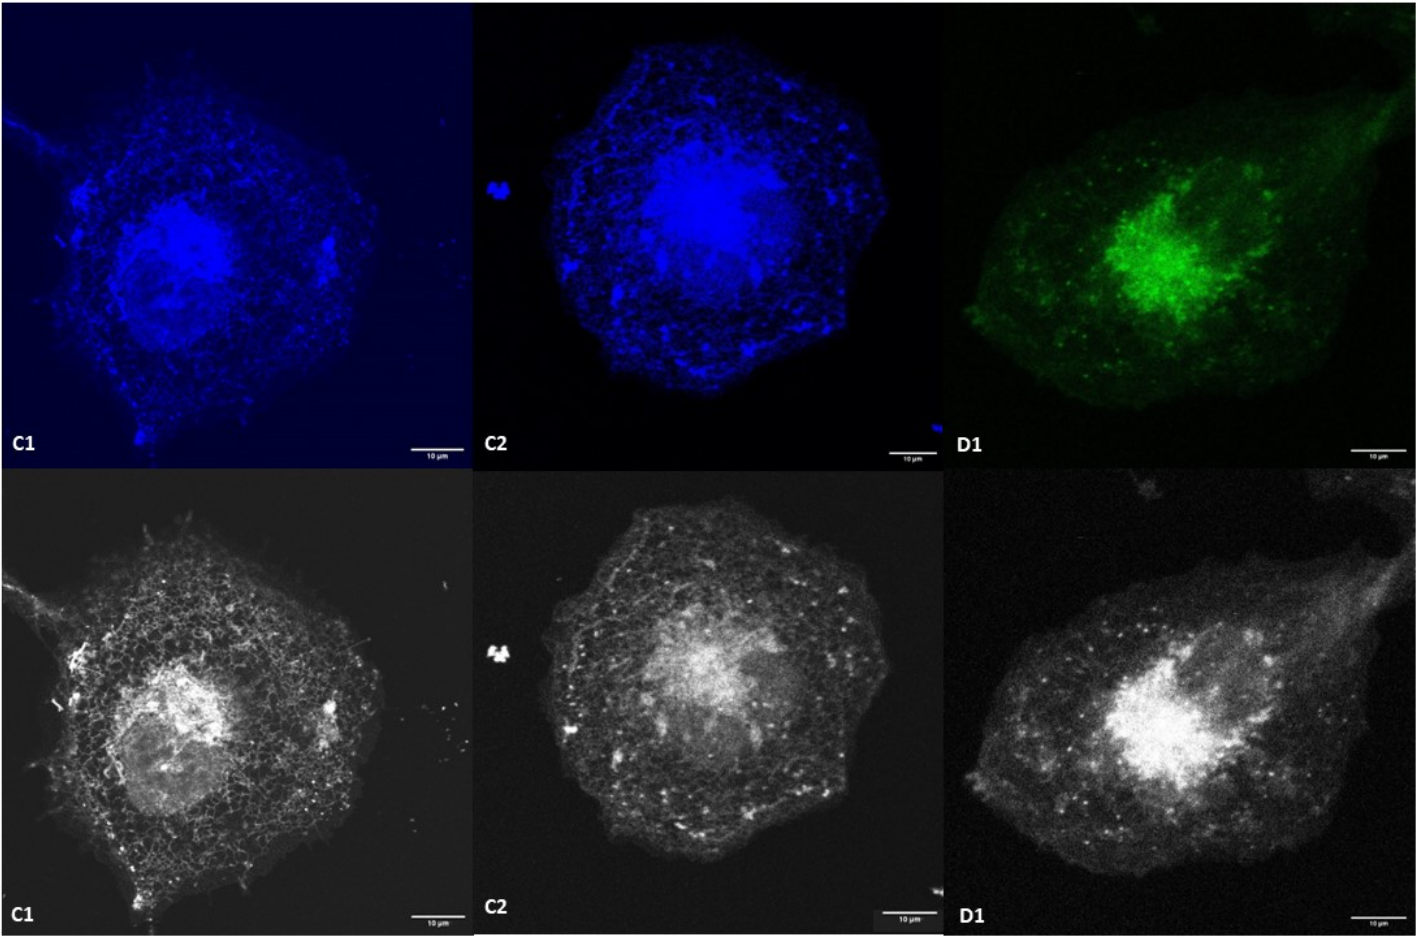

**Figure S15.** Compatibility with trypsinization **C1**, **C2**, **D1**, **P1** and **P2** in HeLa Cells. Scale bar: 10  $\mu\text{m}$

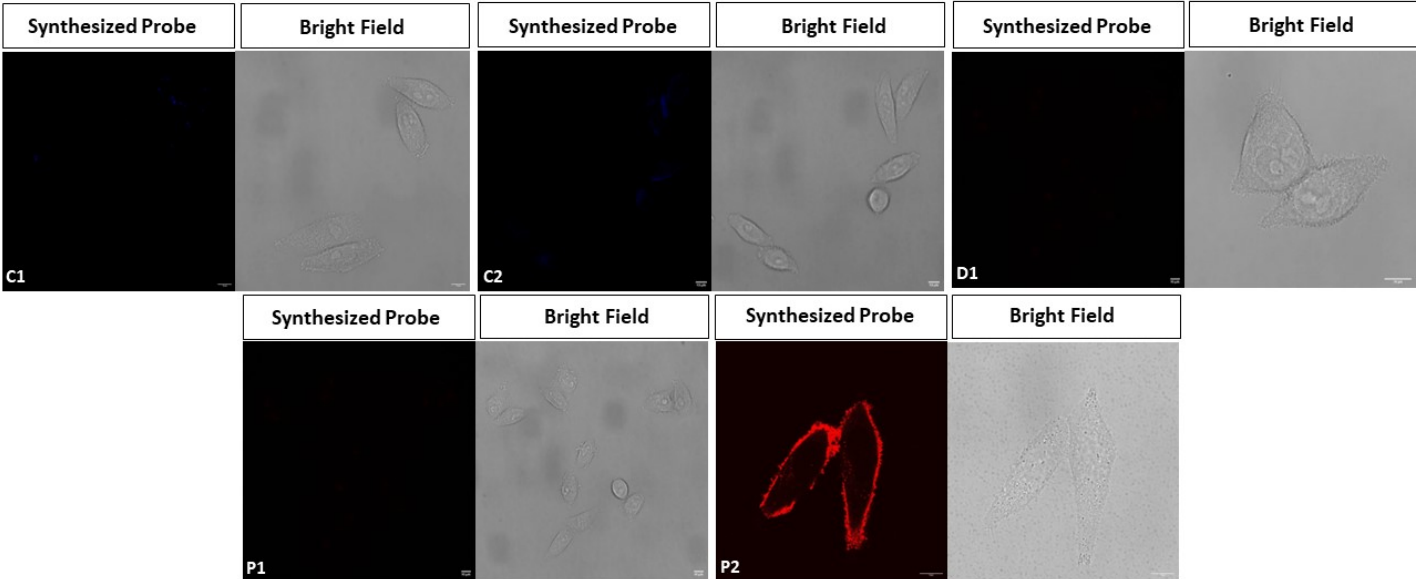



**Figure S16.** Standardized condition for multi-organelle imaging (HeLa cells-upper panel and A549 cells-lower panel)

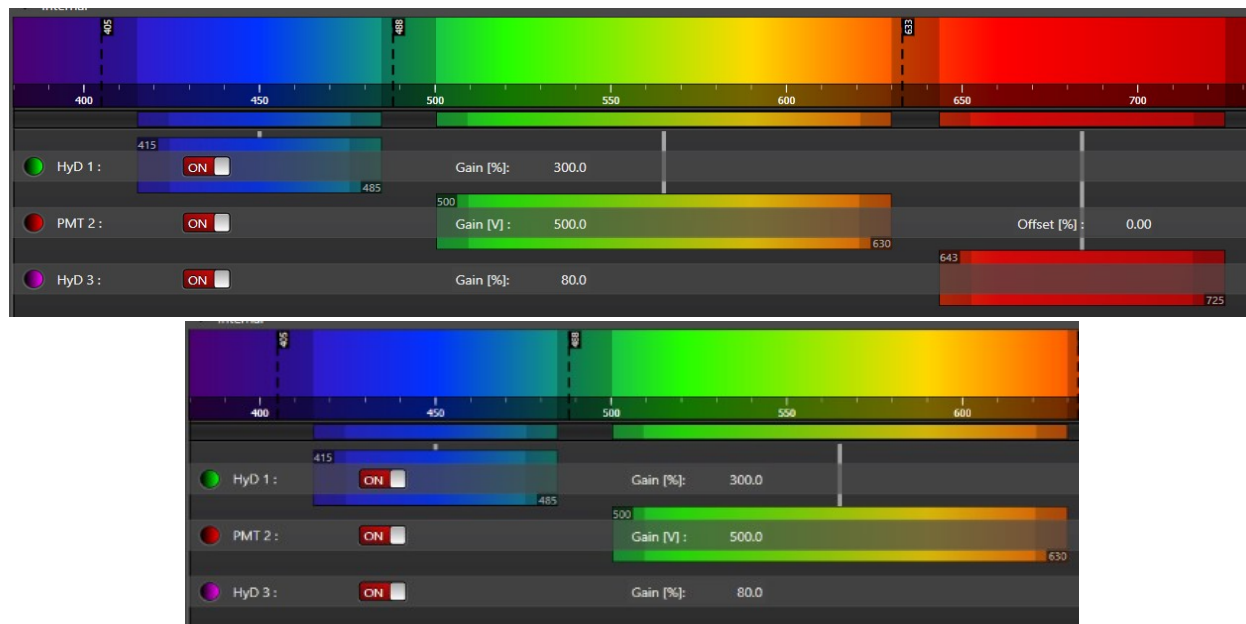

**Figure S17.** No Spillover experiment with (A549 cells) Scale bar: 10  $\mu\text{m}$

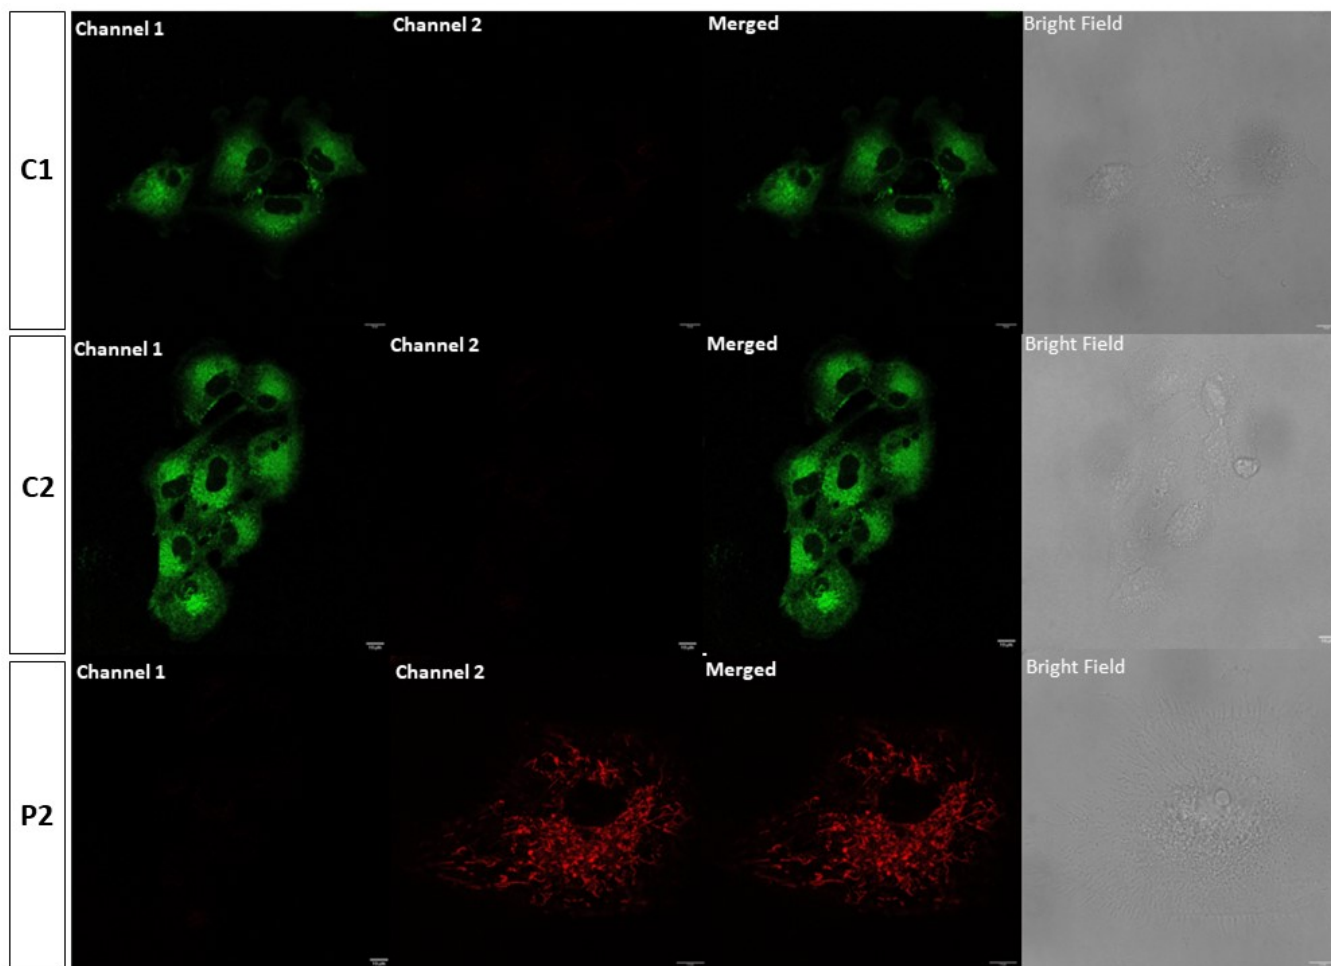

**Figure S18.** Triple Imaging using C1/C2 and P2 in HeLa cells. Scale bar: 10  $\mu\text{m}$

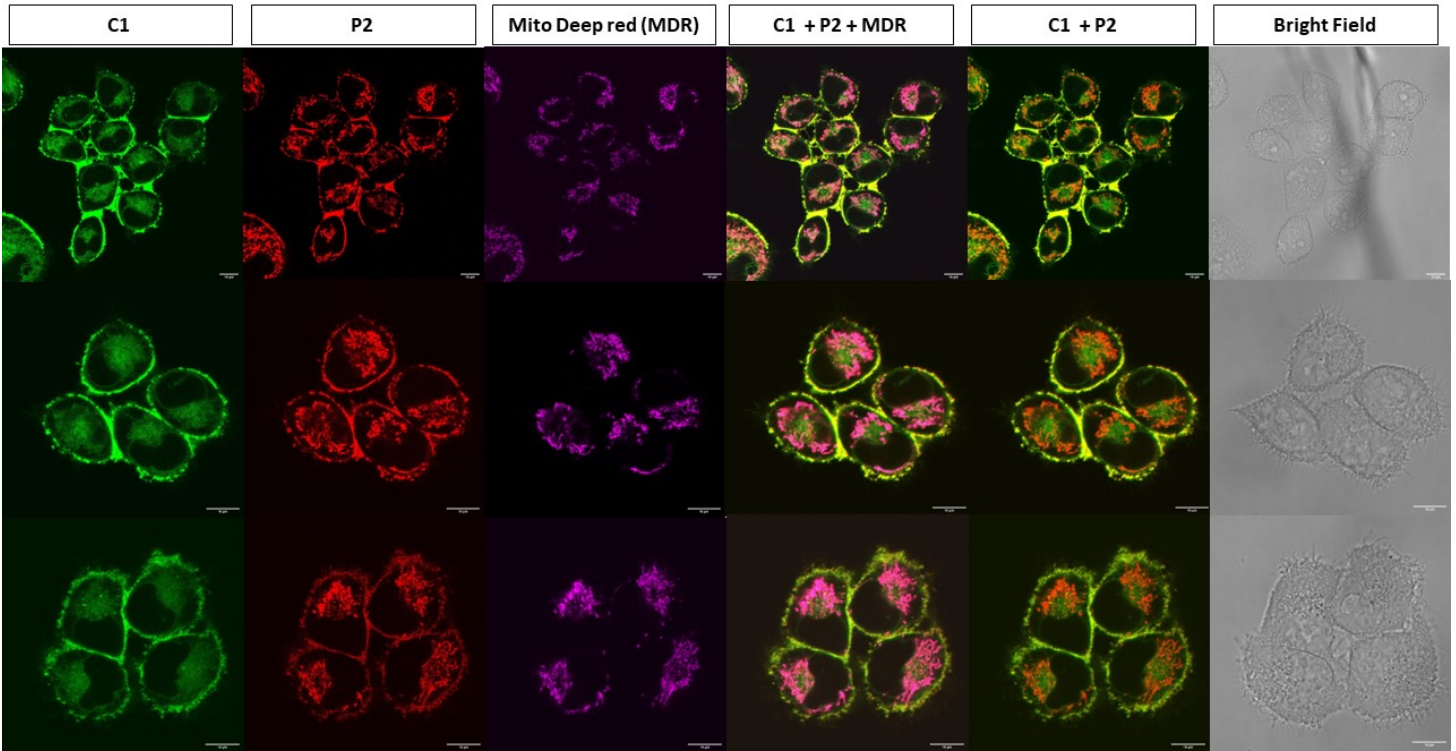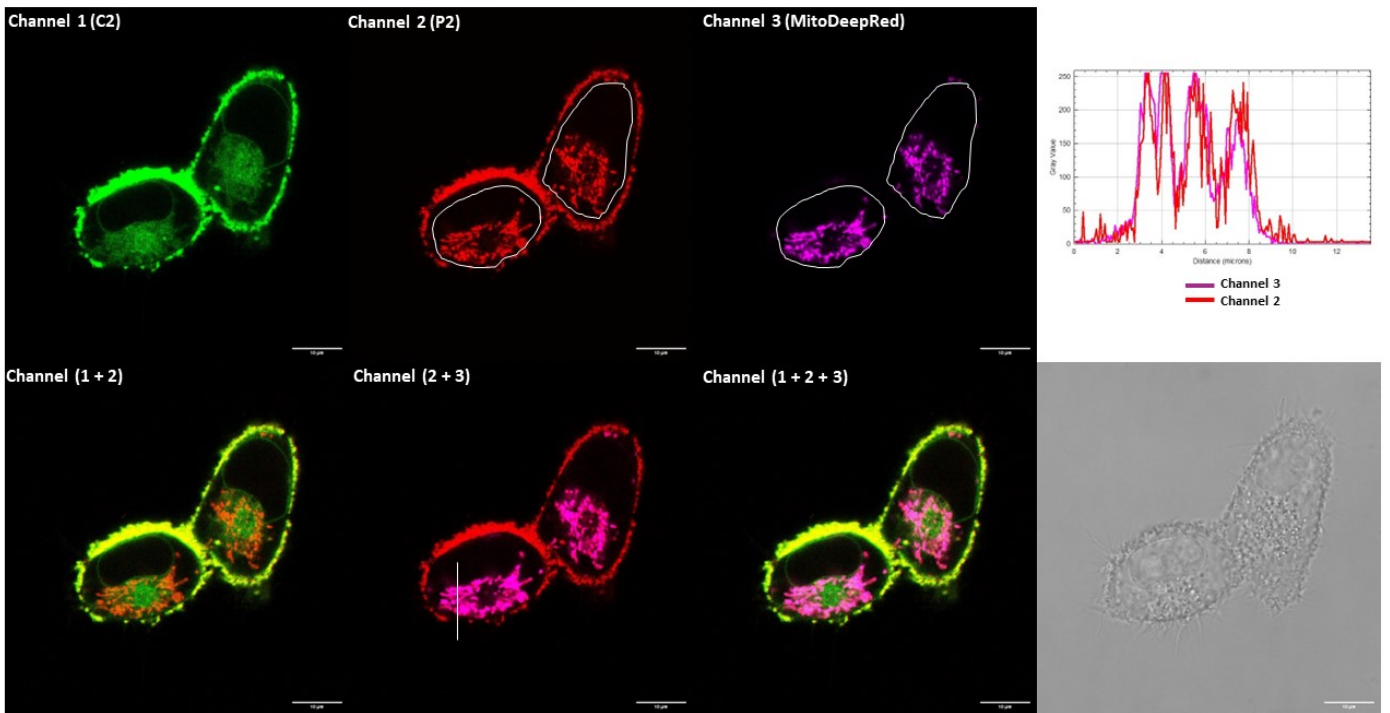

**Figure S19.** Dual Imaging using **C2** and **P2** in A549 cells. Scale bar: 10  $\mu$ m

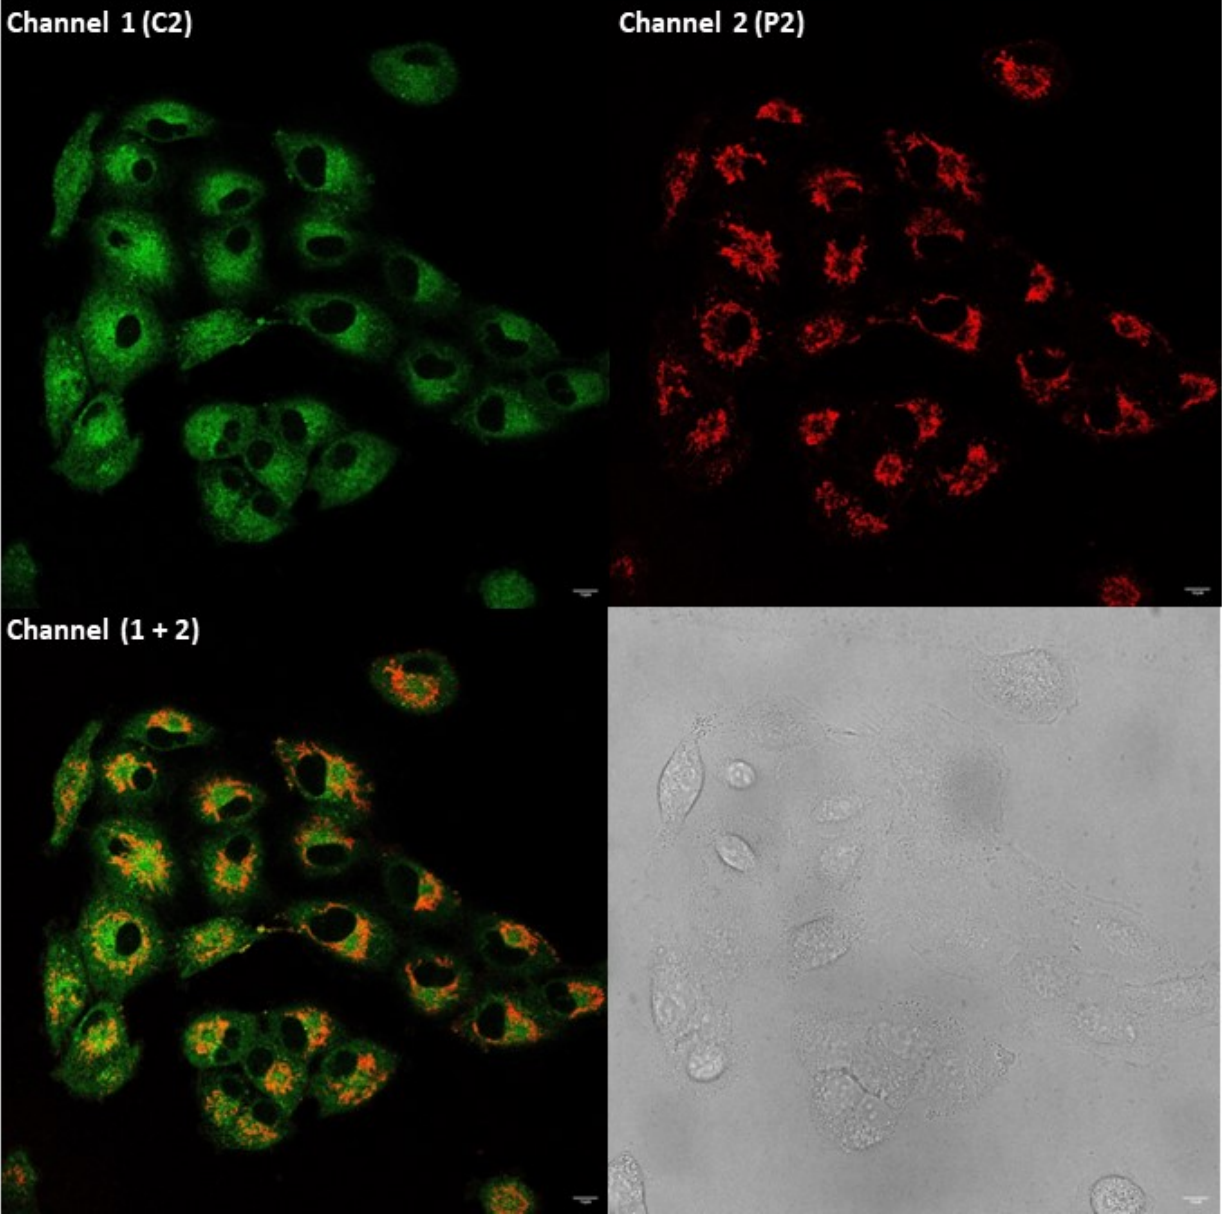



Figure S20. 3D Projection (Upper panel – HeLa and Lower panel – A549)

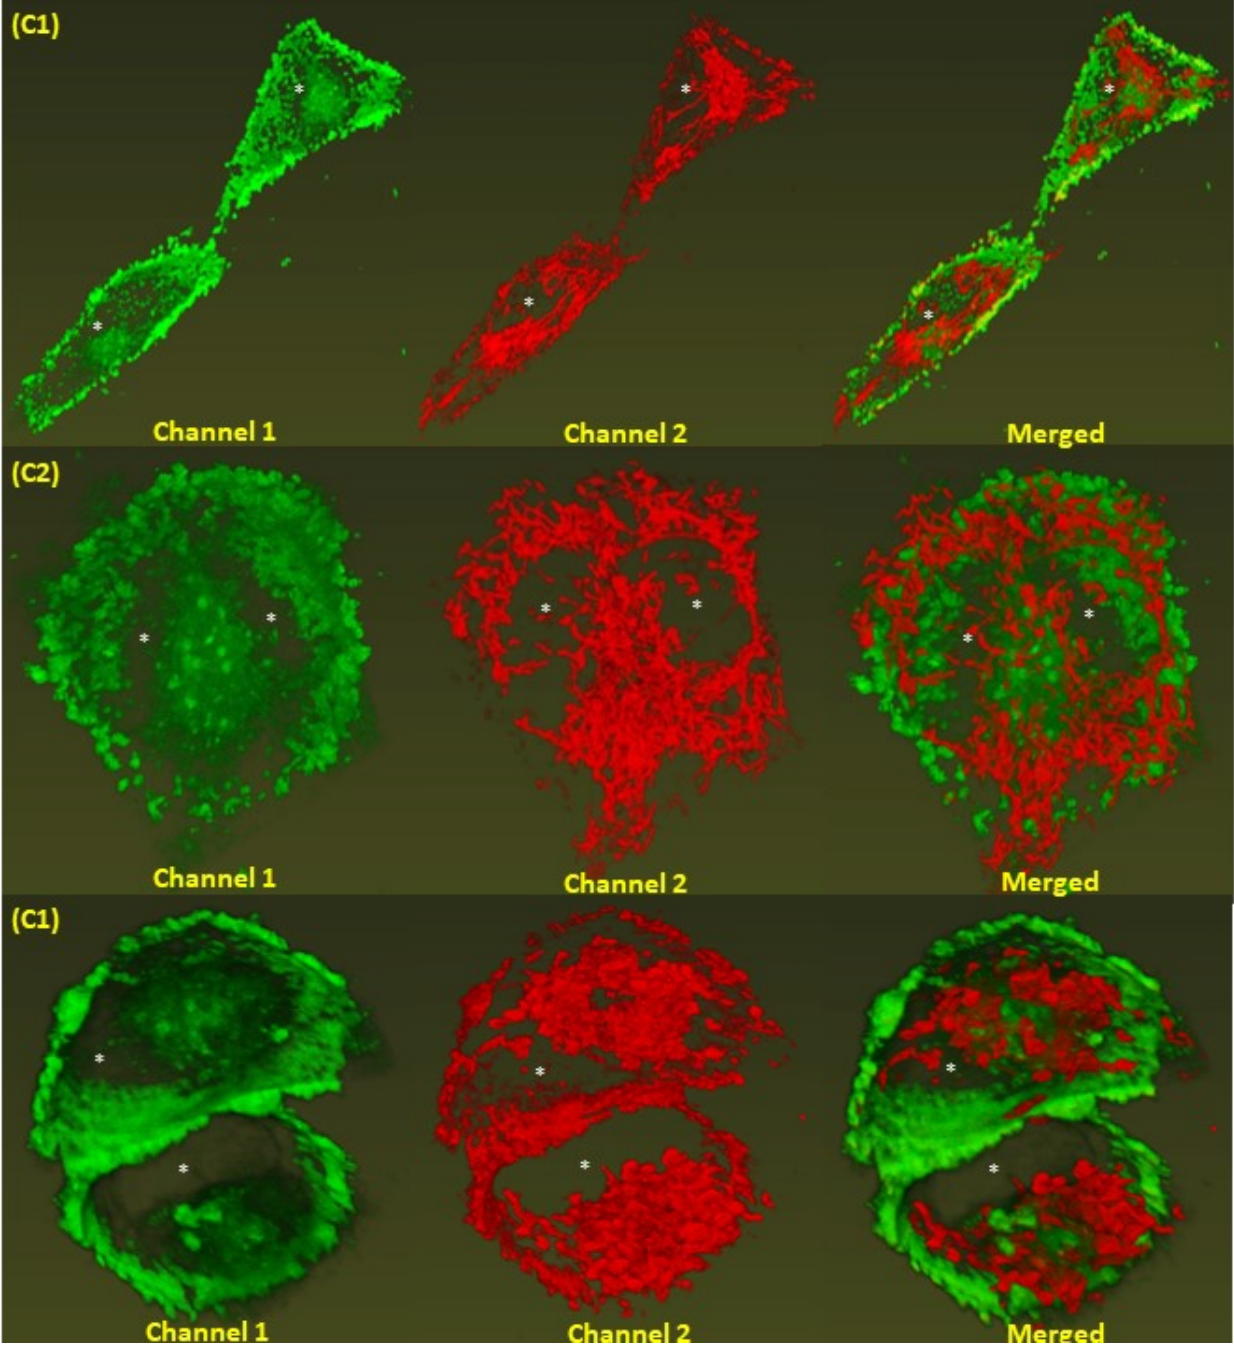

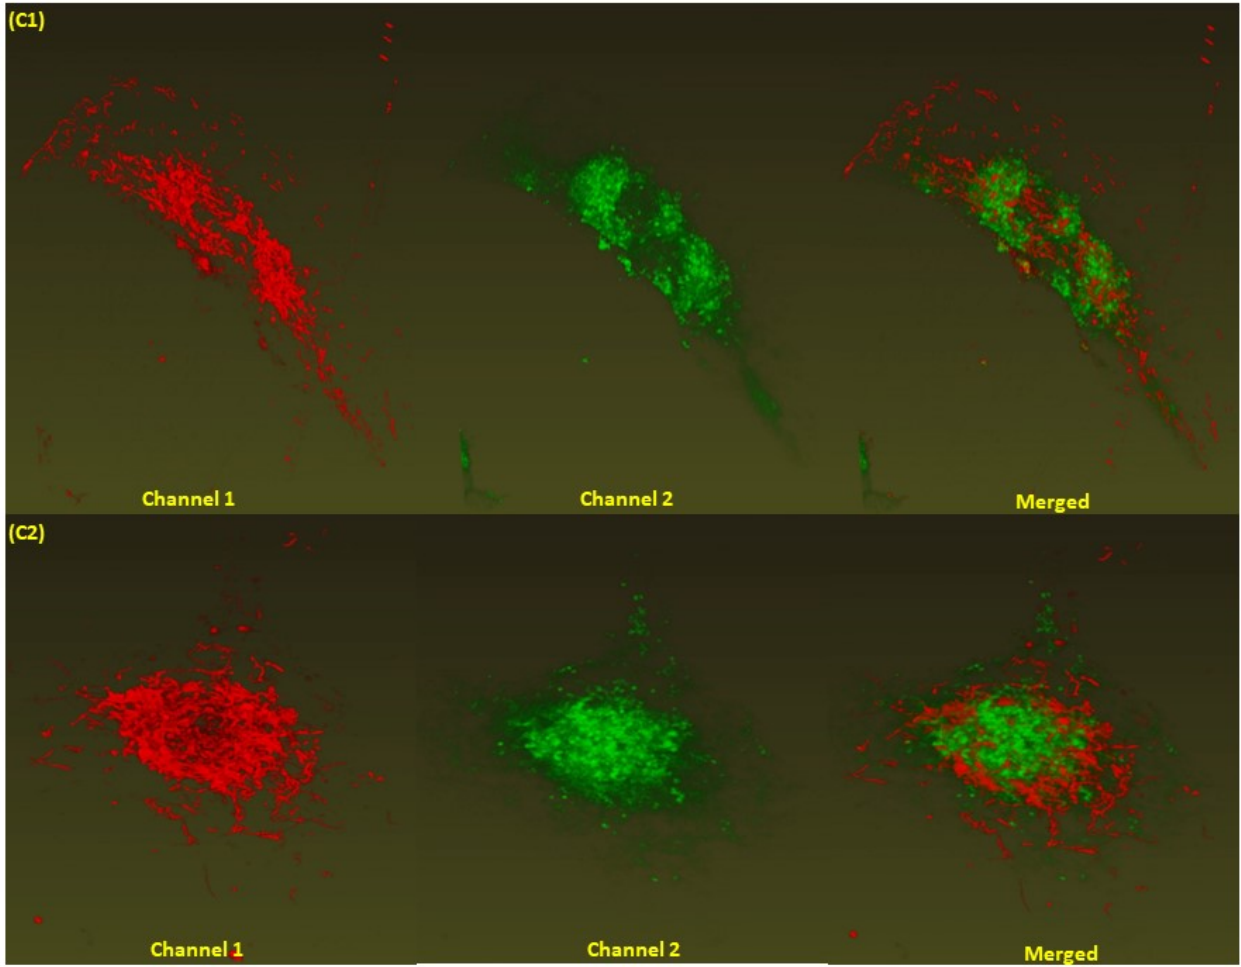

**Figure S21.** Response to pH: The dye (10  $\mu\text{M}$ ) was dissolved in water of varying pH levels (1, 3, 5, 7, 9, 11, 13) and excited at the respective  $\lambda_{\text{max}}$  of the probe in water.

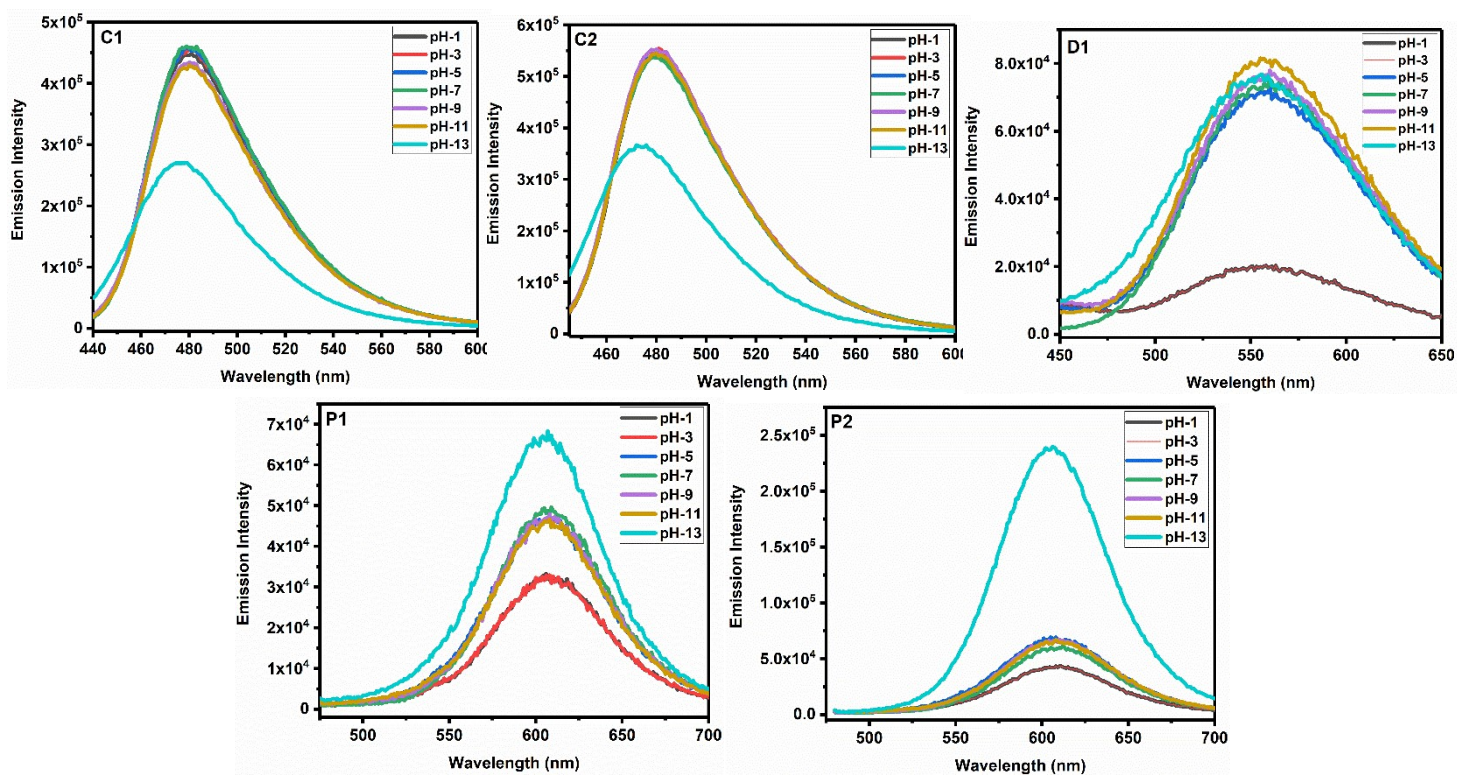



**Figure S22.** Response to analyte - The dye (10  $\mu\text{M}$ ) and analyte (10  $\mu\text{M}$ ) were mixed in water, incubated for 15 minutes, and excited at the respective  $\lambda_{\text{max}}$  of the probe in water.

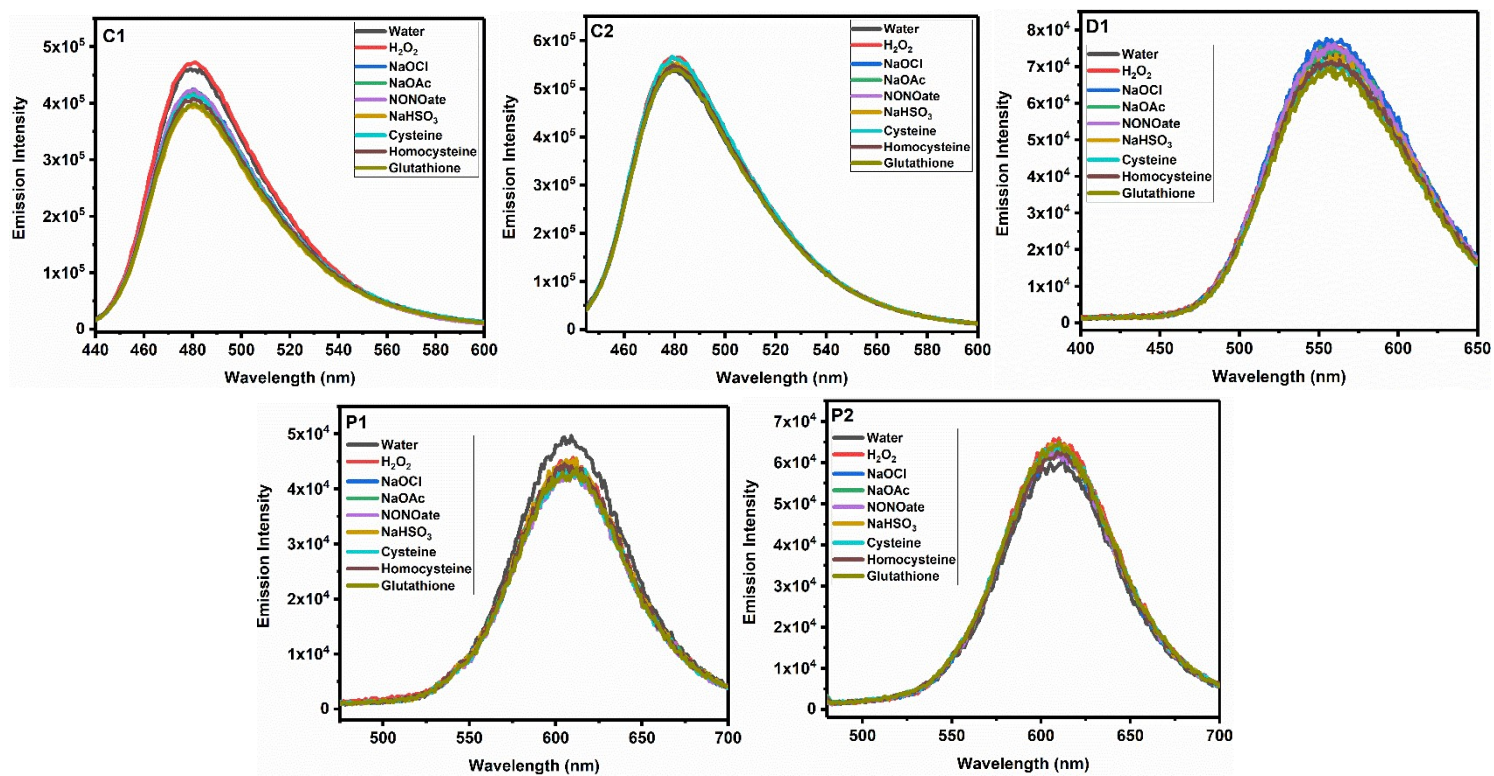



## S23 . Characterization Data

### **7-(diethylamino)-2-oxo-2H-chromene-3-carboxylic acid**

**<sup>1</sup>H NMR** (500 MHz, DMSO-d<sub>6</sub>): δ (ppm) 12.52 (s, 1H), 8.60 (s, 1H), 7.65 (d, *J* = 10.0 Hz, 1H), 6.82-6.79 (dd, *J*<sub>1</sub> = 5.0 Hz, *J*<sub>2</sub> = 5.0 Hz, 1H), 6.58 (s, 1H), 6.49 (q, *J* = 5.0 Hz, 4H), 1.14 (t, *J* = 5.0 Hz, 6H). **<sup>13</sup>C NMR** (126 MHz; DMSO-d<sub>6</sub>) δ (ppm) 164.98, 159.96, 158.38, 153.38, 149.94, 132.33, 110.53, 107.84, 107.63, 96.39, 44.86, 12.79. **HRMS** (ESI) *m/z*: calculated for C<sub>14</sub>H<sub>15</sub>NO<sub>4</sub>Na<sup>+</sup> [M+Na]<sup>+</sup>: 284.0893; Found: 284.0901

### **7-(diethylamino)-2-oxo-N-(4-sulfamoylphenethyl)-2H-chromene-3-carboxamide (C1)**

**<sup>1</sup>H NMR** (500 MHz, DMSO-d<sub>6</sub>): δ (ppm) 8.73 (t, *J* = 5.0 Hz, 1H), 8.65 (s, 1H), 7.76 (d, *J* = 10.0 Hz, 2H), 7.68 (d, *J* = 10.0 Hz, 1H), 7.45 (d, *J* = 10.0 Hz, 2H), 7.31 (s, 2H), 6.80 (dd, 1H), 6.60 (d, *J* = 5.0 Hz, 1H), 3.58 (q, *J* = 5.0 Hz, 2H), 3.48 (q, *J* = 5.0 Hz, 4H), 2.92 (t, *J* = 5.0 Hz, 2H), 1.14 (t, *J* = 5.0 Hz, 6H). **<sup>13</sup>C NMR** (126 MHz; DMSO-d<sub>6</sub>) δ (ppm) 162.66, 162.17, 157.69, 152.91, 148.21, 144.06, 142.59, 132.07, 129.60, 126.22, 110.61, 109.69, 108.12, 96.30, 44.80, 35.38, 12.78. **HRMS** (ESI) *m/z*: calculated for C<sub>22</sub>H<sub>26</sub>N<sub>3</sub>O<sub>5</sub>S<sup>+</sup> [M+H]<sup>+</sup>: 444.1588; Found: 444.1595

### **7-(diethylamino)-N-(4-(N-(6-(diethylamino)-2-oxo-2H-chromene-3-carbonyl)sulfamoyl)phenethyl)-2-oxo-2H-chromene-3-carboxamide (C2)**

**<sup>1</sup>H NMR** (500 MHz, DMSO-d<sub>6</sub>): δ (ppm) 8.73 (t, *J* = 5.0 Hz, 1H), 8.66 (s, 1H), 7.76 (d, *J* = 10.0 Hz, 2H), 7.68 (d, *J* = 10.0 Hz, 1H), 7.52 (s, 4H), 7.45 (d, *J* = 10.0 Hz, 2H), 7.32 (s, 2H), 6.80 (dd, 1H), 6.60 (s, 1H), 4.47 (s, 1H), 3.58 (q, *J* = 5.0 Hz, 2H), 3.48 (q, *J*<sub>1</sub> = 5.0 Hz, *J*<sub>2</sub> = 10.0 Hz, 4H), 3.16 (q, *J* = 5.0 Hz, 4H), 2.92 (t, *J* = 5.0 Hz, 2H), 1.31 (t, *J* = 5.0 Hz, 6H), 1.14 (t, *J* = 5.0 Hz, 6H). **<sup>13</sup>C NMR** (126 MHz; DMSO-d<sub>6</sub>) δ (ppm) 162.67, 162.17, 157.69, 152.92, 148.20, 144.07, 142.59, 133.00, 132.07, 130.72, 129.60, 129.54, 128.29, 126.22, 110.61, 109.69, 108.12, 96.30, 59.90, 55.38, 52.44, 44.80, 35.38, 12.77, 7.94. **HRMS** (ESI) *m/z*: calculated for C<sub>36</sub>H<sub>39</sub>N<sub>4</sub>O<sub>8</sub>S<sup>+</sup> [M+H]<sup>+</sup>: 685.2332; Found: 685.2029

### **5-(dimethylamino)-N-(4-sulfamoylphenethyl)naphthalene-1-sulfonamide (D1)**

**<sup>1</sup>H NMR** (500 MHz, CDCl<sub>3</sub>): δ (ppm) 8.46 (d, *J* = 10.0 Hz, 1H), 8.27 (d, *J* = 10.0 Hz, 1H), 8.09 (dd, 1H), 8.05 (t, *J* = 5.0 Hz, 1H), 7.66 (d, *J* = 10.0 Hz, 2H), 7.63-7.56 (m, 2H), 7.27 (t, *J* = 5.0 Hz, 5H), 3.05 (q, *J* = 5.0 Hz, 2H), 2.83 (s, 6H), 2.71 (t, *J* = 5.0 Hz, 2H). **<sup>13</sup>C NMR** (126 MHz;

CDCl<sub>3</sub>)  $\delta$  (ppm) 151.81, 143.32, 142.58, 136.40, 129.90, 129.59, 129.53, 128.71, 128.31, 126.04, 124.07, 119.60, 115.64, 45.54, 43.94, 35.55. **HRMS** (ESI)  $m/z$ : calculated for C<sub>20</sub>H<sub>24</sub>N<sub>3</sub>O<sub>4</sub>S<sub>2</sub><sup>+</sup> [M+H]<sup>+</sup>: 434.1203; Found: 434.1209

**(E)-N,N-dimethyl-4-(2-(pyridin-4-yl)vinyl)aniline (NPy)**

**<sup>1</sup>H NMR** (500 MHz, CDCl<sub>3</sub>):  $\delta$  (ppm) 8.51 (d,  $J = 5.0$  Hz, 2H), 7.44 (d,  $J = 10.0$  Hz, 2H), 7.32 (d,  $J = 5.0$  Hz, 2H), 7.22 (s, 1H), 6.79 (d,  $J = 15.0$  Hz, 1H), 6.71 (d,  $J = 10.0$  Hz, 2H), 3.01 (s, 6H). **<sup>13</sup>C NMR** (126 MHz; CDCl<sub>3</sub>)  $\delta$  (ppm) 150.78, 150.01, 145.57, 133.35, 128.32, 124.26, 121.17, 120.40, 112.19, 40.32. **HRMS** (ESI)  $m/z$ : calculated for C<sub>15</sub>H<sub>17</sub>N<sub>2</sub><sup>+</sup> [M+H]<sup>+</sup>: 225.1386; Found: 225.1379

**(E)-1-(7-carboxyheptyl)-4-(4-(dimethylamino)styryl)pyridin-1-ium bromide (P1)**

**<sup>1</sup>H NMR** (500 MHz, DMSO-d<sub>6</sub>):  $\delta$  (ppm) 12.00 (s, 1H), 8.80 (d,  $J = 10.0$  Hz, 2H), 8.08 (d,  $J = 5.0$  Hz, 2H), 7.94 (d,  $J = 15.0$  Hz, 1H), 7.61 (d,  $J = 5.0$  Hz, 2H), 7.19 (d,  $J = 15.0$  Hz, 1H), 6.79 (d,  $J = 10.0$  Hz, 2H), 4.42 (t,  $J = 5.0$  Hz, 2H), 3.03 (s, 6H), 2.19 (t,  $J = 5.0$  Hz, 2H), 1.87 (t,  $J = 5.0$  Hz, 2H), 1.48 (t,  $J = 5.0$  Hz, 2H), 1.28 (t,  $J = 5.0$  Hz, 6H). **<sup>13</sup>C NMR** (126 MHz; DMSO-d<sub>6</sub>)  $\delta$  (ppm) 174.92, 154.20, 152.40, 143.96, 142.65, 130.66, 122.97, 122.88, 117.61, 112.43, 59.55, 34.05, 30.91, 28.75, 28.55, 25.76, 24.80. **HRMS** (ESI)  $m/z$ : calculated for C<sub>23</sub>H<sub>31</sub>N<sub>2</sub>O<sub>2</sub><sup>+</sup> [M]<sup>+</sup>: 367.2380; Found: 367.2390

**4-((E)-4-(dimethylamino)styryl)-1-(8-((4-(2-(8-(4-((E)-4-(dimethylamino)styryl)pyridin-1-ium-1-yl)octanamido)ethyl)phenyl)sulfonamido)-8-oxooctyl)pyridin-1-ium bromide (P2)**

**<sup>1</sup>H NMR** (500 MHz, DMSO-d<sub>6</sub>):  $\delta$  (ppm) 8.79 (d,  $J = 10.0$  Hz, 2H), 8.05 (d,  $J = 10.0$  Hz, 2H), 7.95-7.90 (m, 2H), 7.74 (d,  $J = 10.0$  Hz, 1H), 7.66 (d,  $J = 10.0$  Hz, 1H), 7.60 (d,  $J = 10.0$  Hz, 2H), 7.53 (s, 4H), 7.38 (d,  $J = 10.0$  Hz, 1H), 7.34 (s, 1H), 7.30 (d,  $J = 10.0$  Hz, 1H), 7.18 (d,  $J = 15.0$  Hz, 1H), 6.79 (d,  $J = 10.0$  Hz, 2H), 4.48 (s, 1H), 4.42 (d,  $J = 5.0$  Hz, 2H), 3.29 (d,  $J = 5.0$  Hz, 2H), 3.16 (q,  $J_1 = 5.0$  Hz,  $J_2 = 10.0$  Hz, 4H), 3.02 (s, 6H), 2.83 (s, 6H), 2.79-2.75 (m, 1H), 2.02 (q,  $J = 5.0$  Hz, 2H), 1.87 (d,  $J = 10.0$  Hz, 2H), 1.44 (d,  $J = 5.0$  Hz, 2H), 1.32-1.18 (m, 19H). **<sup>13</sup>C NMR** (126 MHz; DMSO-d<sub>6</sub>)  $\delta$  (ppm) 172.54, 172.48, 161.54, 154.20, 152.40, 144.25, 143.93, 142.65, 142.47, 133.01, 130.71, 130.66, 129.56, 129.53, 129.24, 128.31, 126.10, 125.57, 122.96, 122.87, 117.59, 112.43, 59.93, 59.59, 52.46, 35.76, 30.93, 28.61, 25.78, 25.56, 7.94. **HRMS** (ESI)  $m/z$ : calculated for C<sub>54</sub>H<sub>70</sub>Br<sub>2</sub>N<sub>6</sub>O<sub>4</sub>S<sup>+</sup> [M]<sup>+</sup>: 1056.3546; Found: 1056.2958

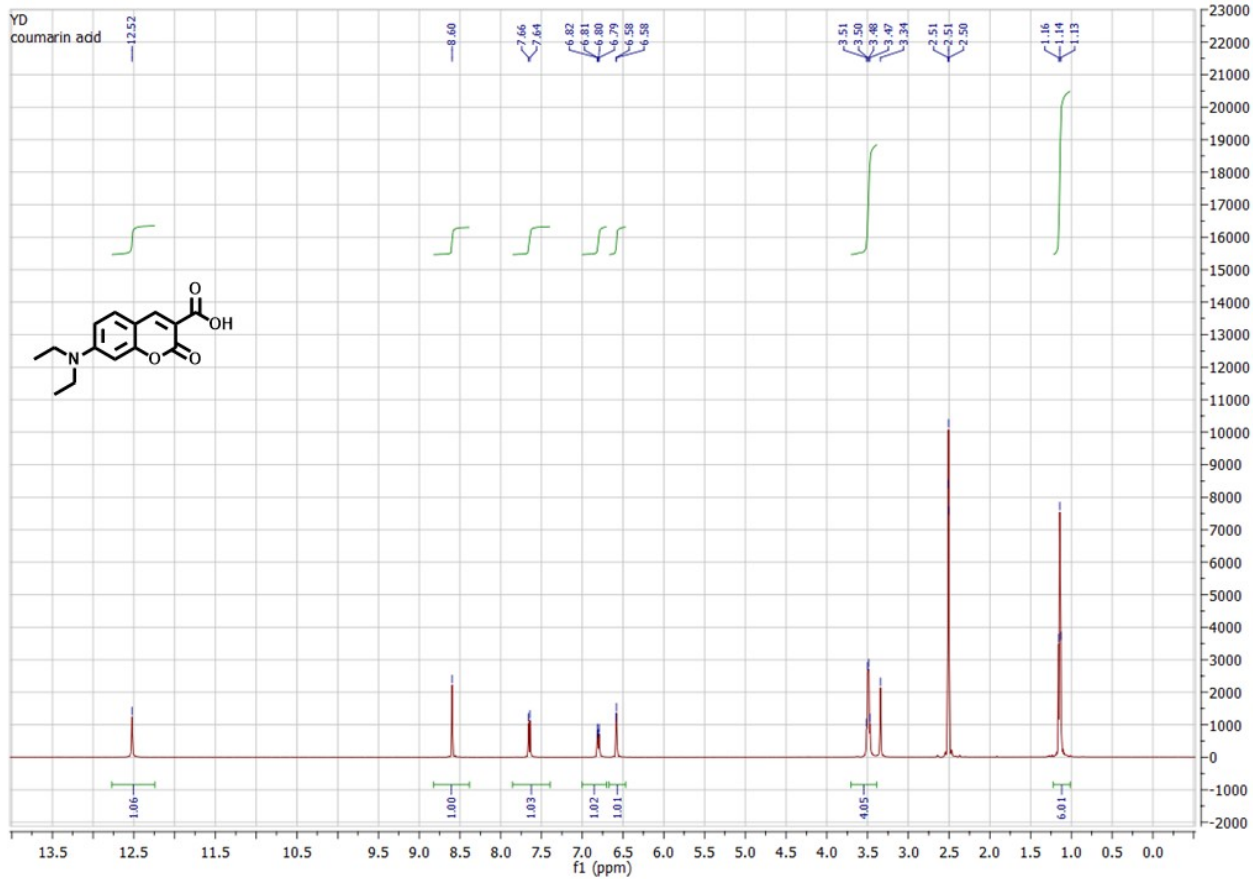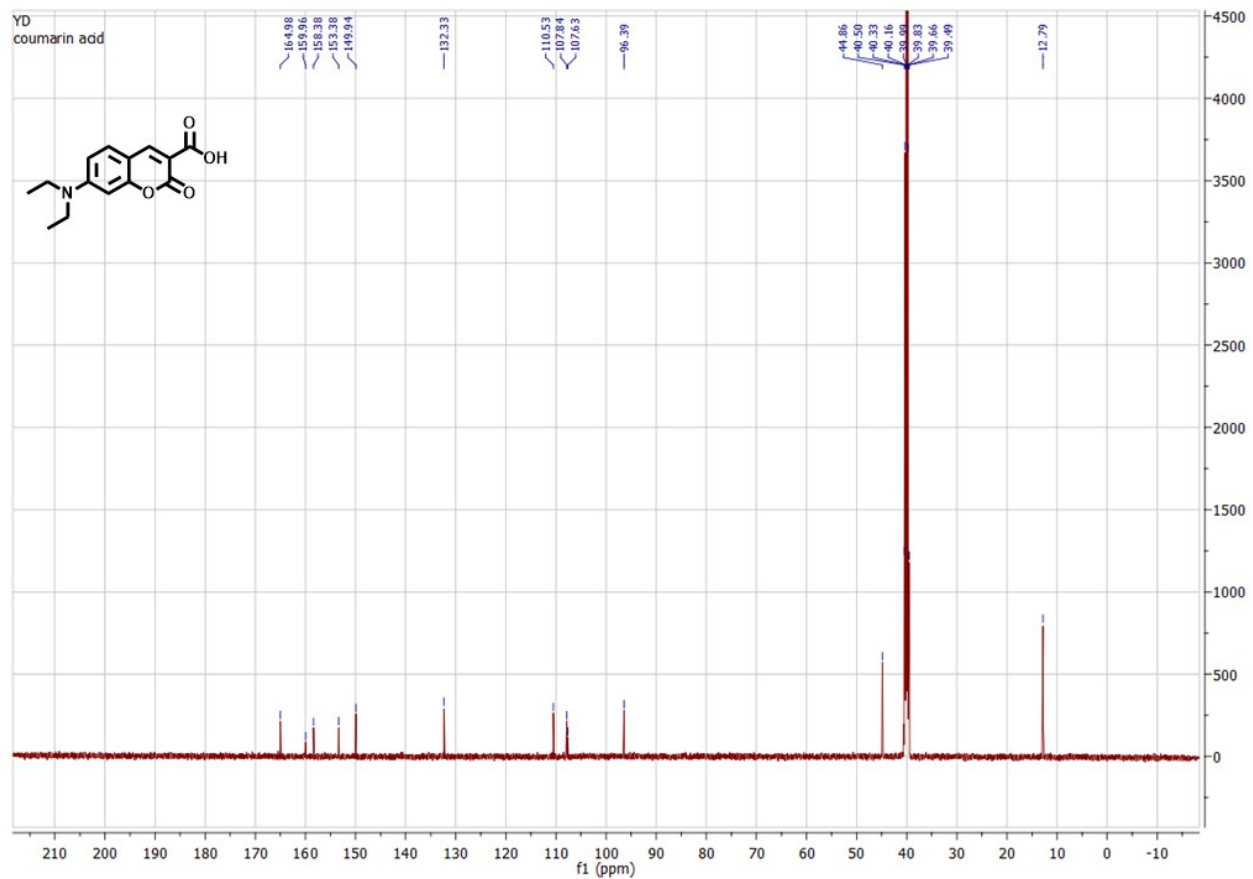

SKG\_M

IITGN\_POS\_14\_JUN\_24\_31\_261 (5.082)

1: TOF MS ES+  
6.70e6

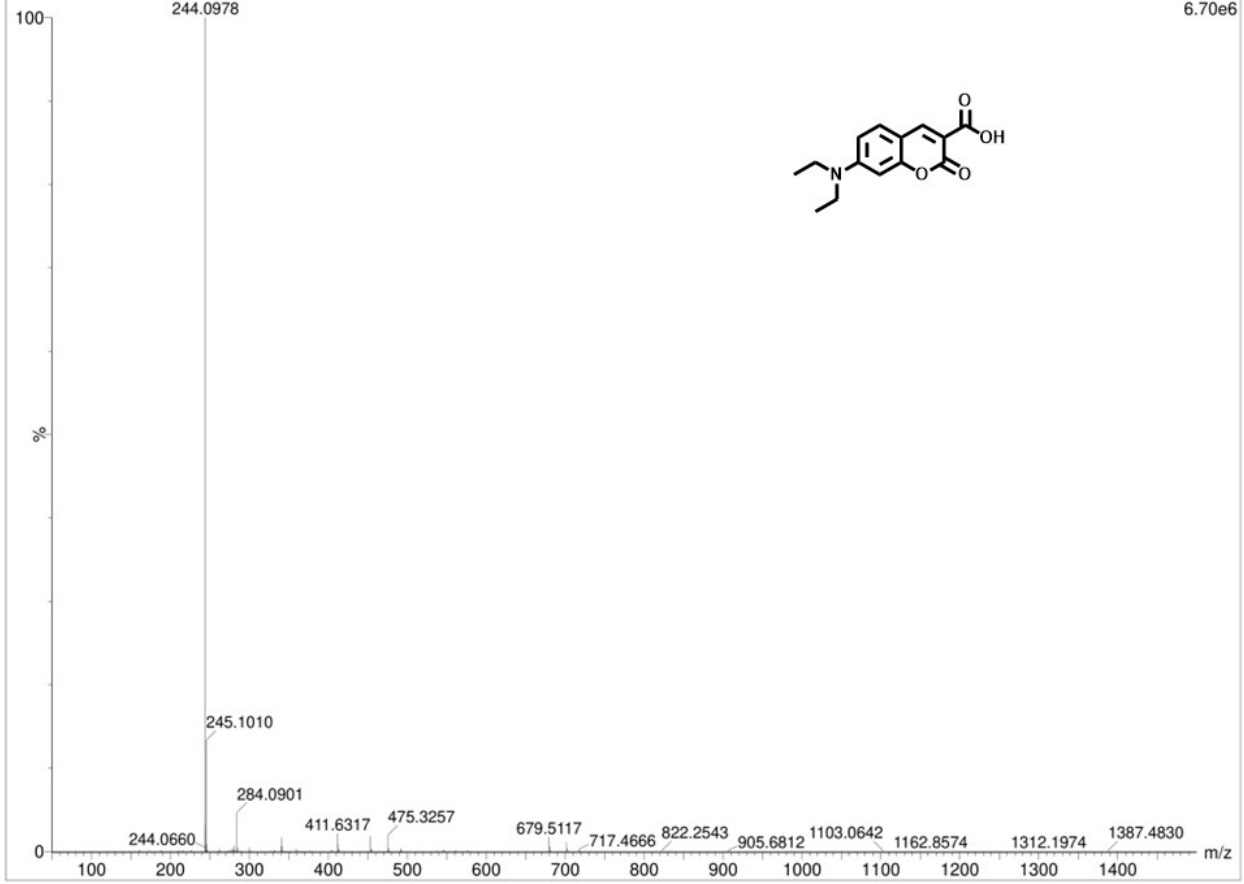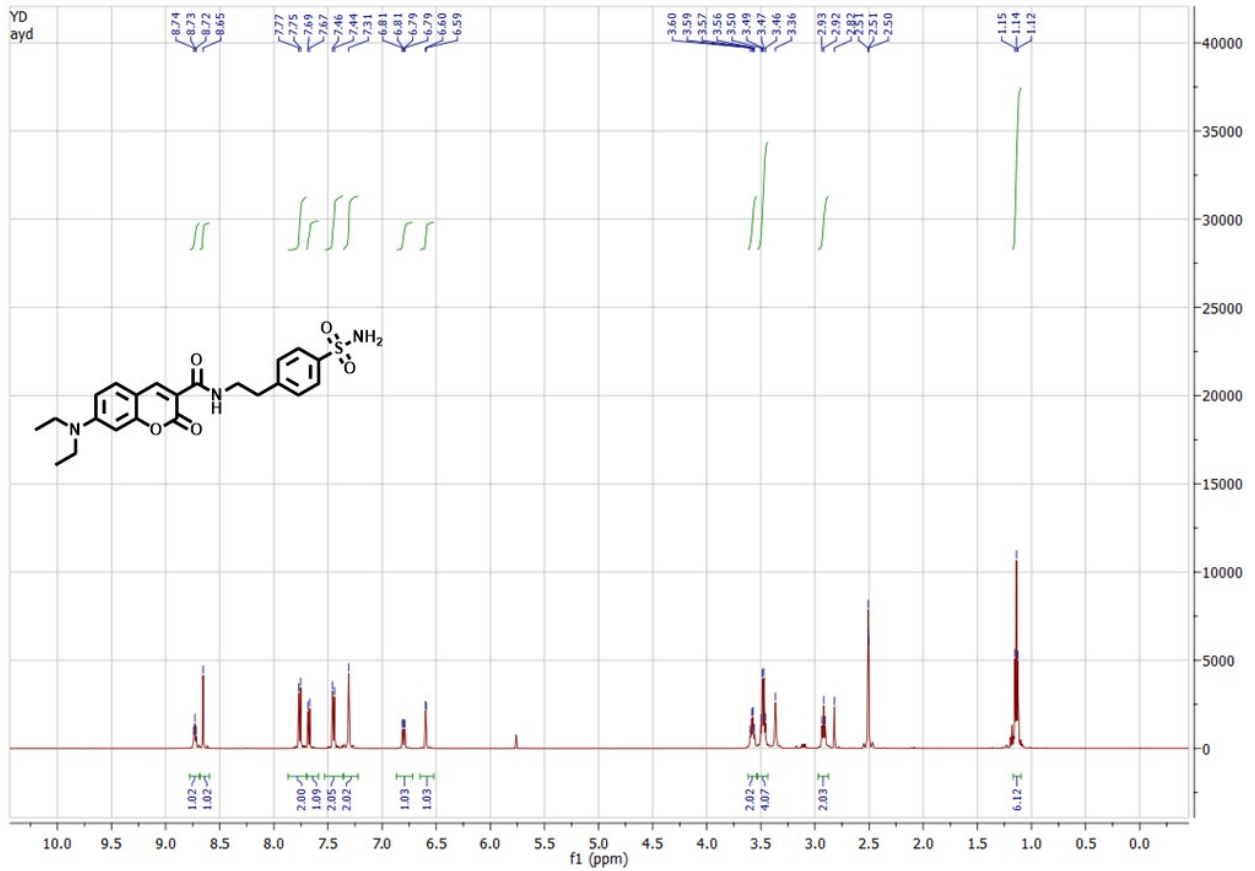

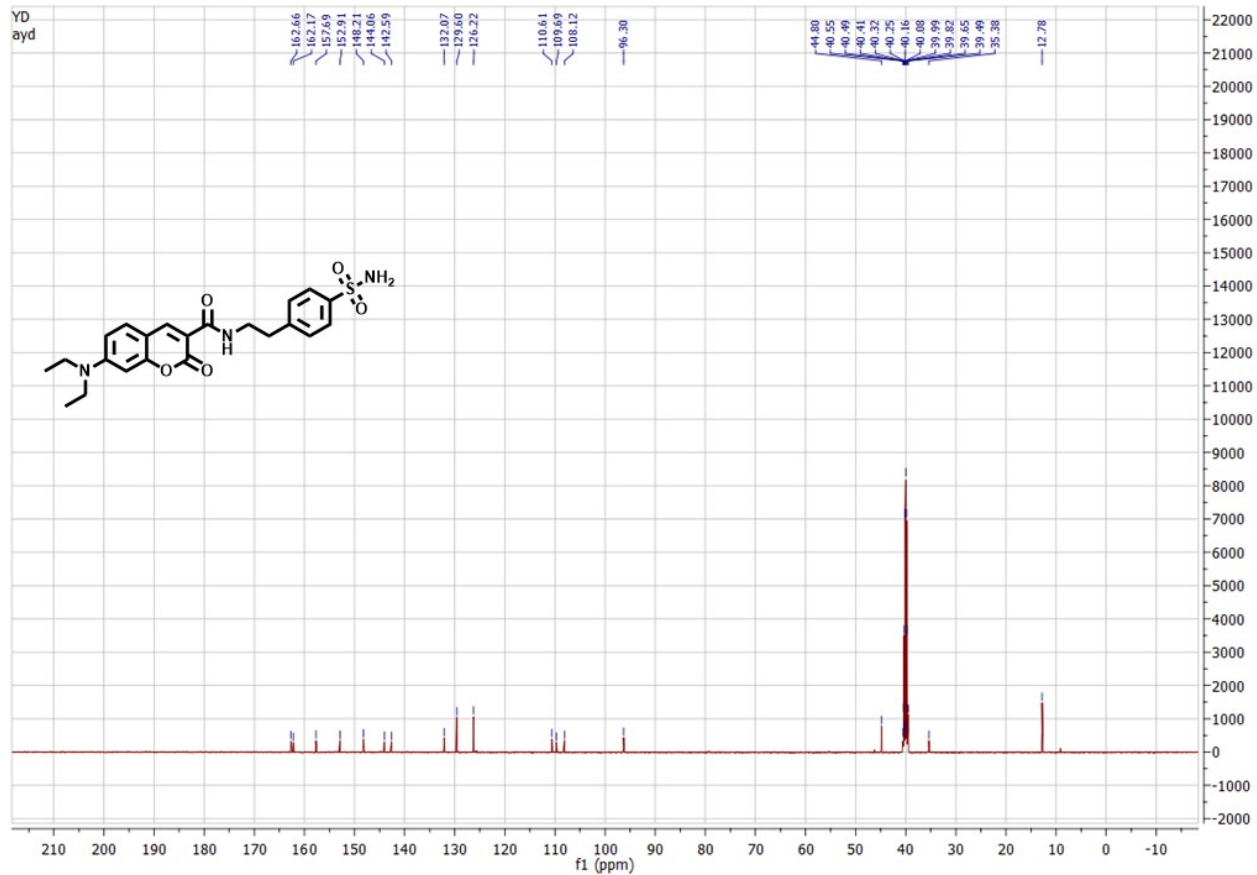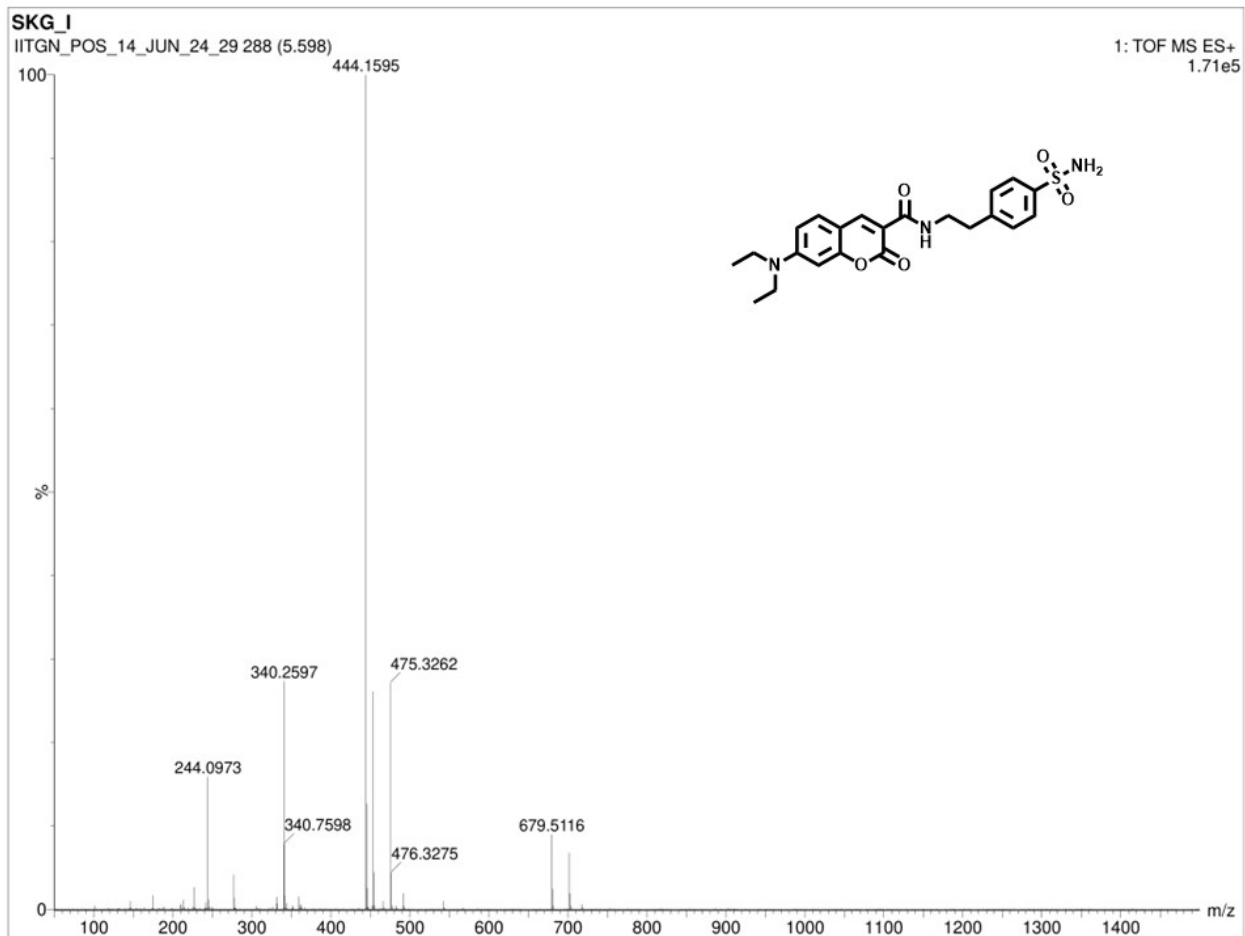

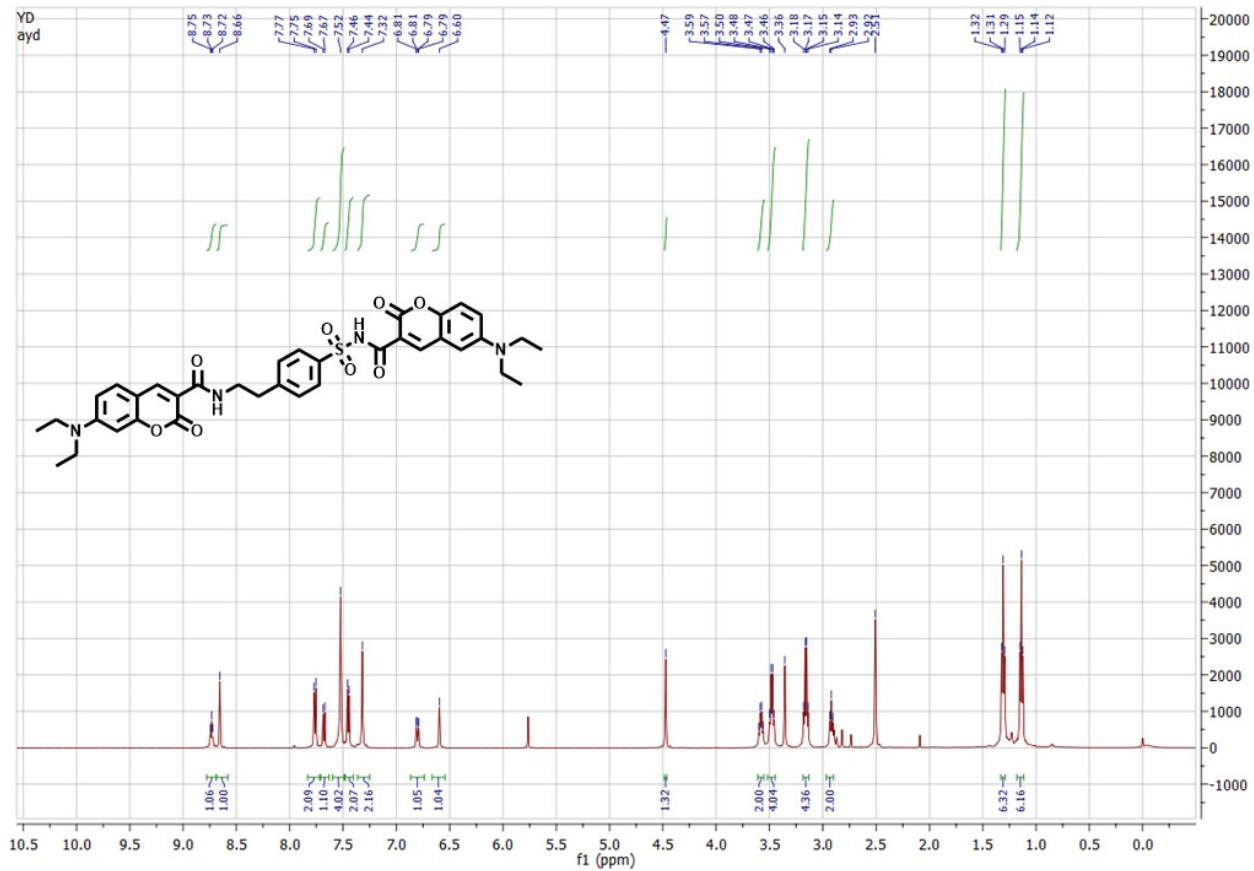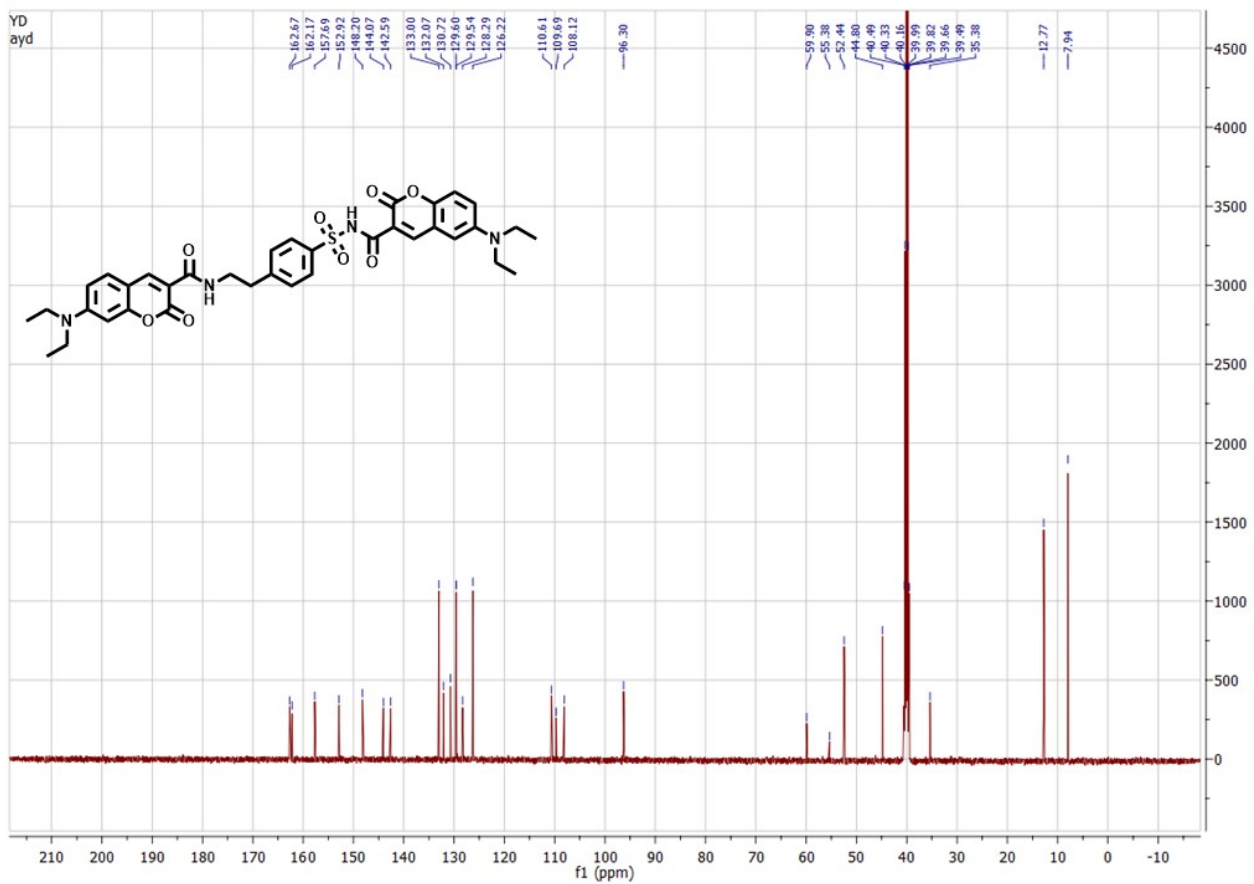

SKG\_TRE

IITGN\_POS\_14\_JUN\_24\_34 460 (8.941)

1: TOF MS ES+  
9.84e4

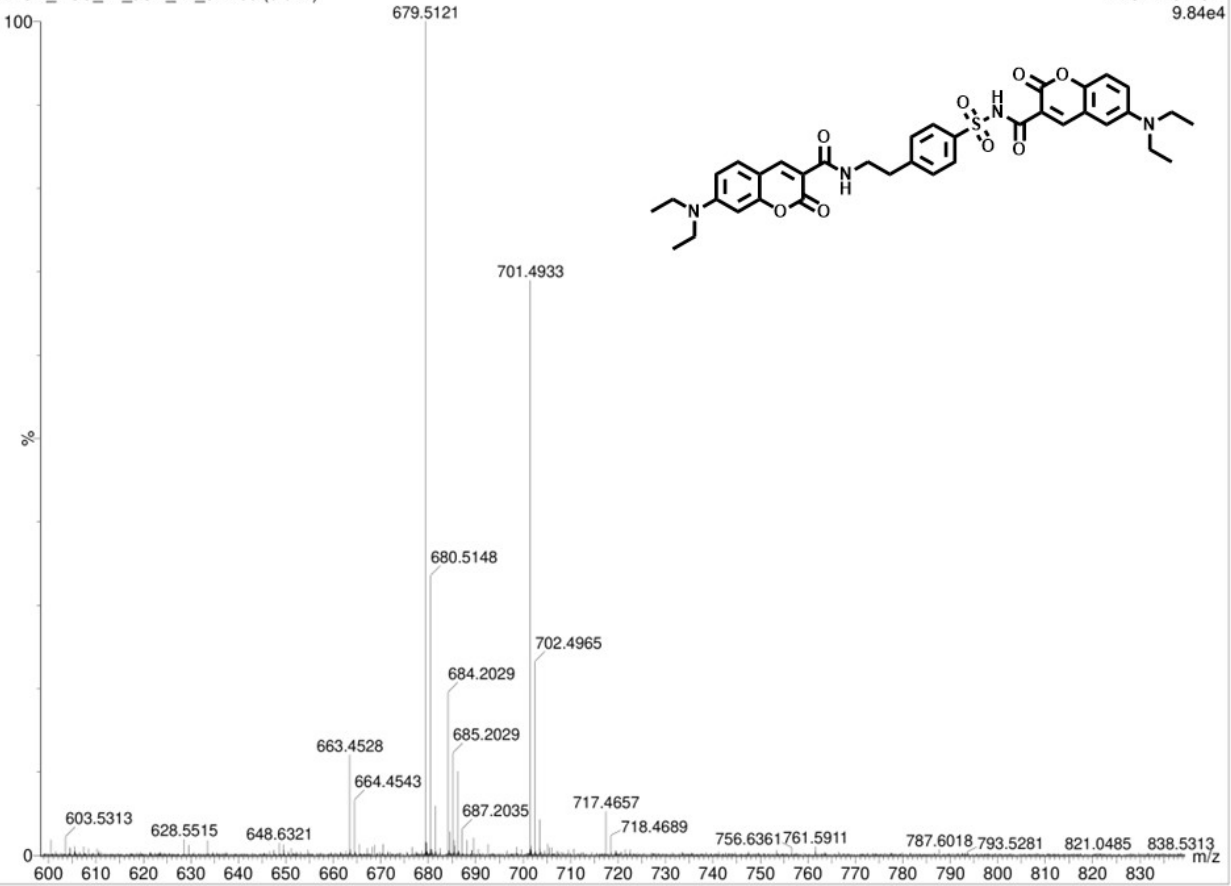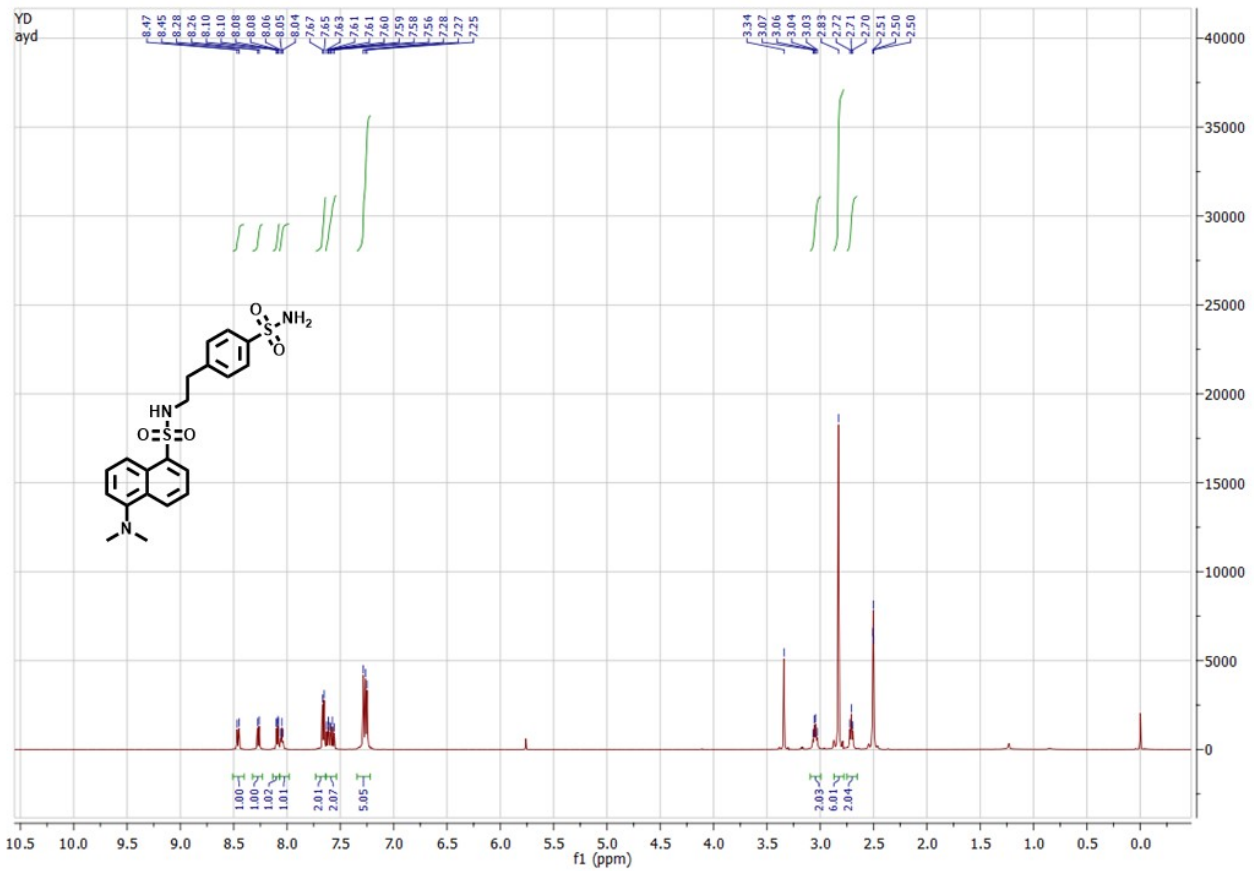



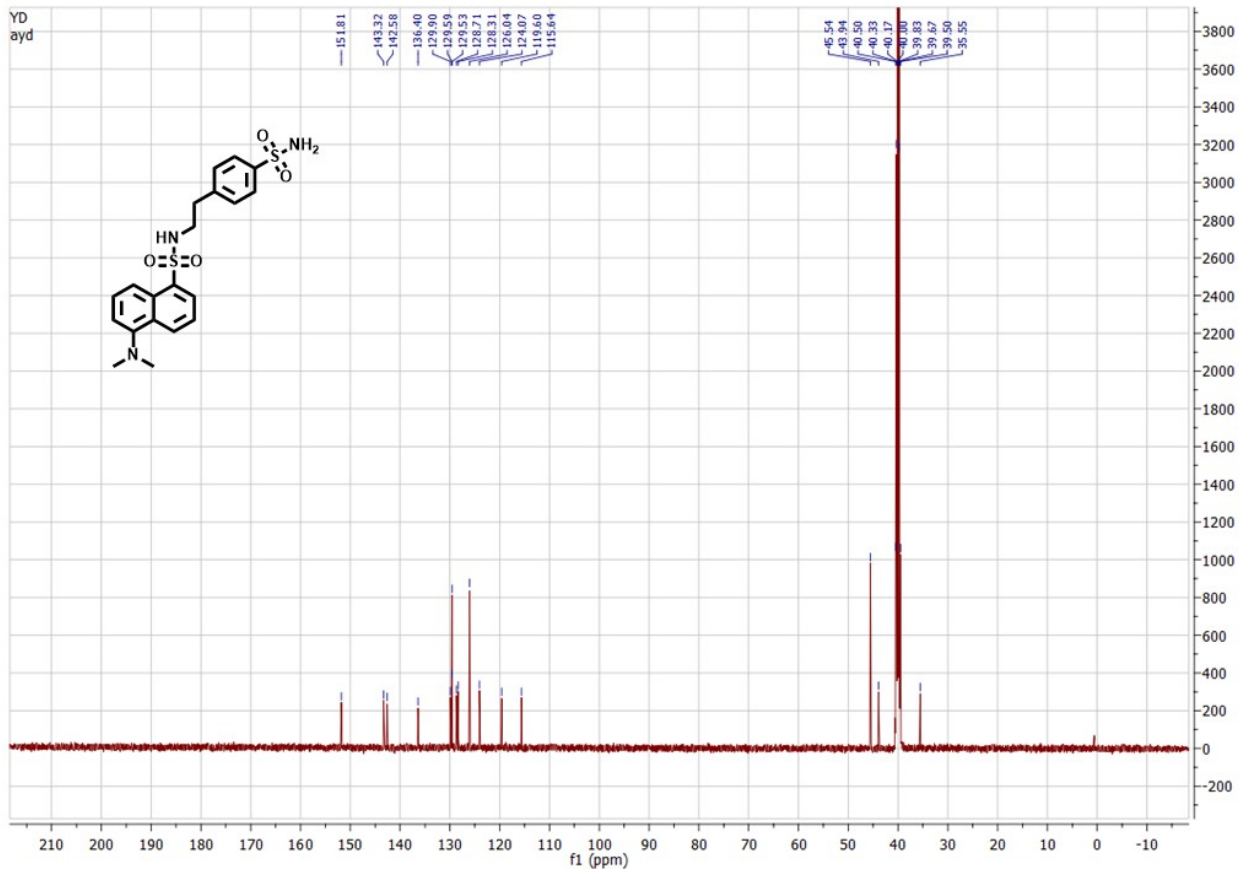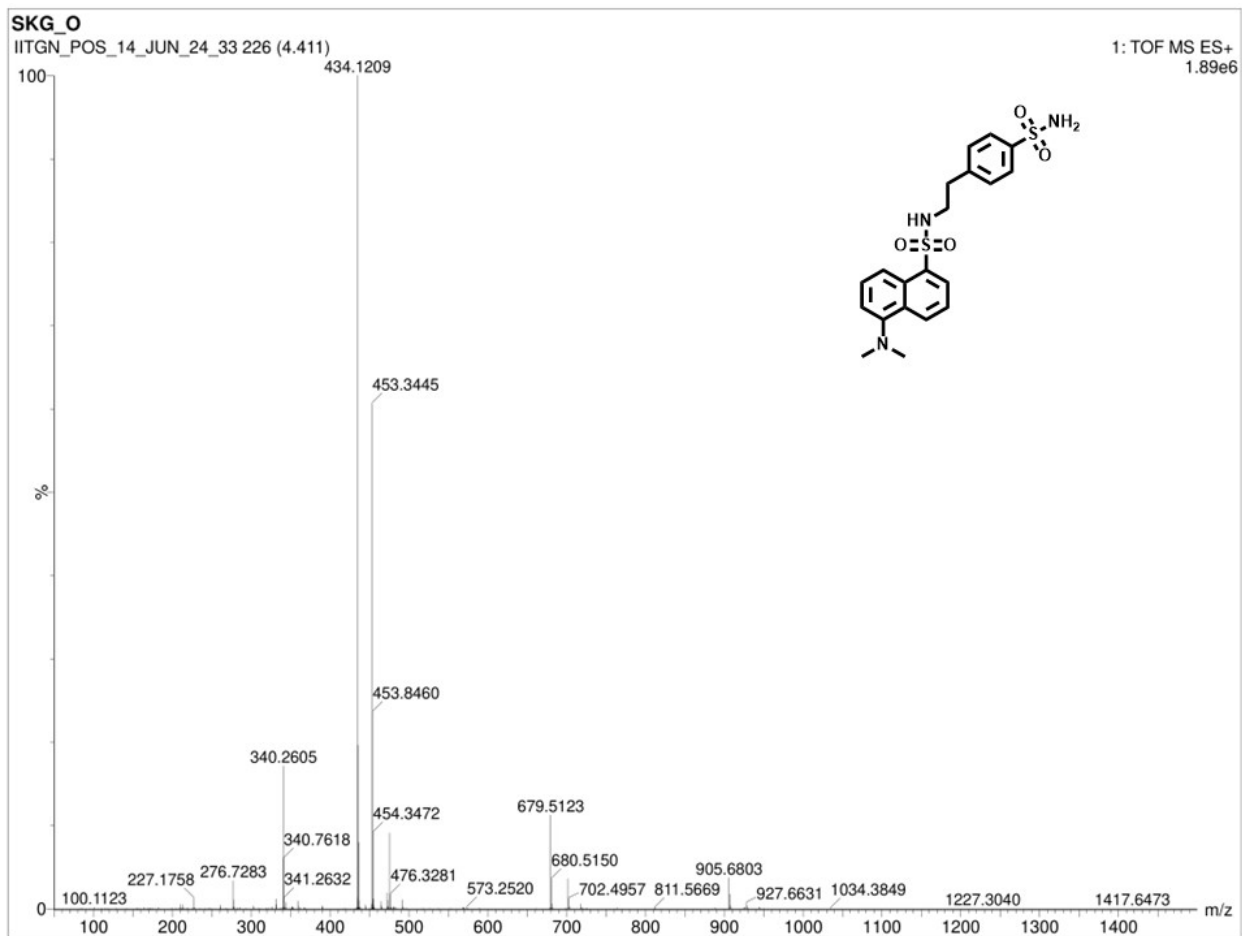

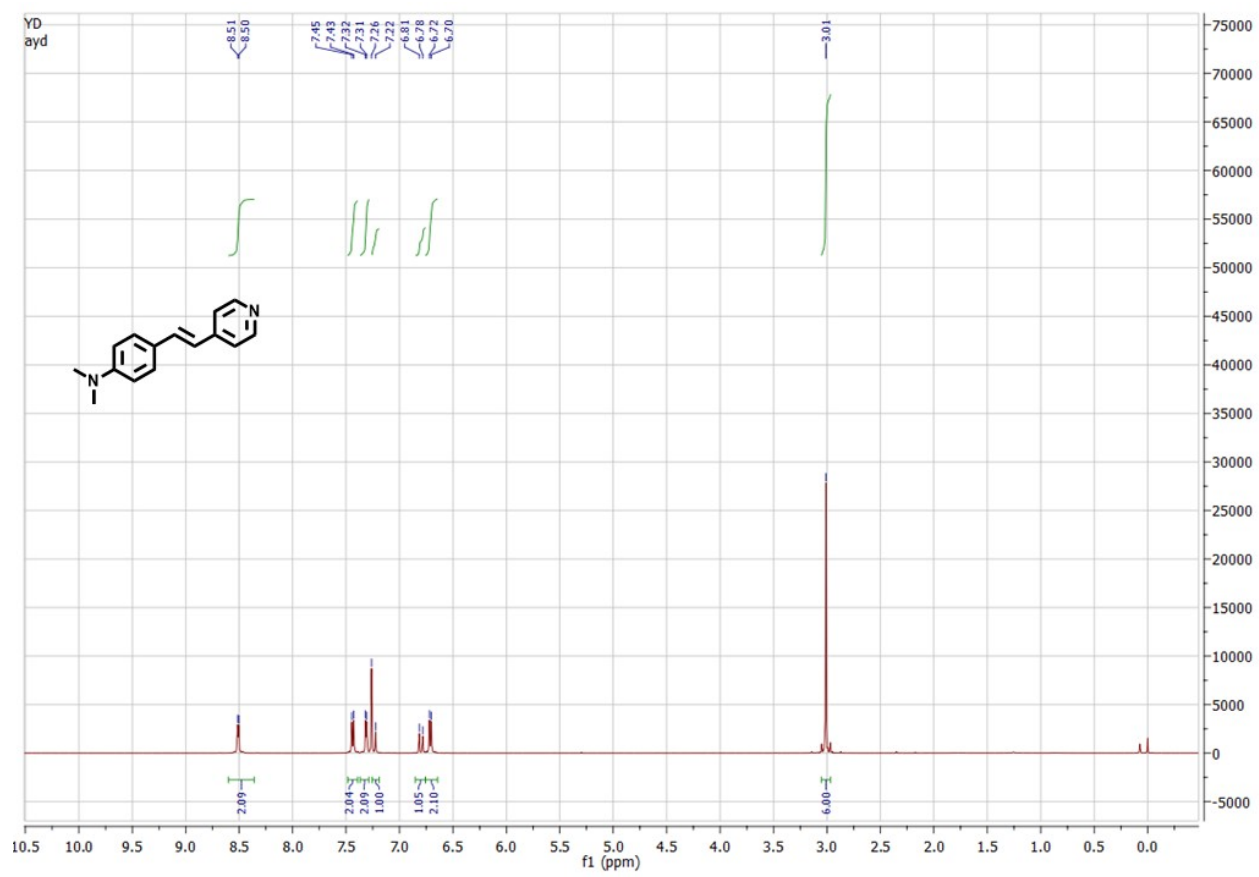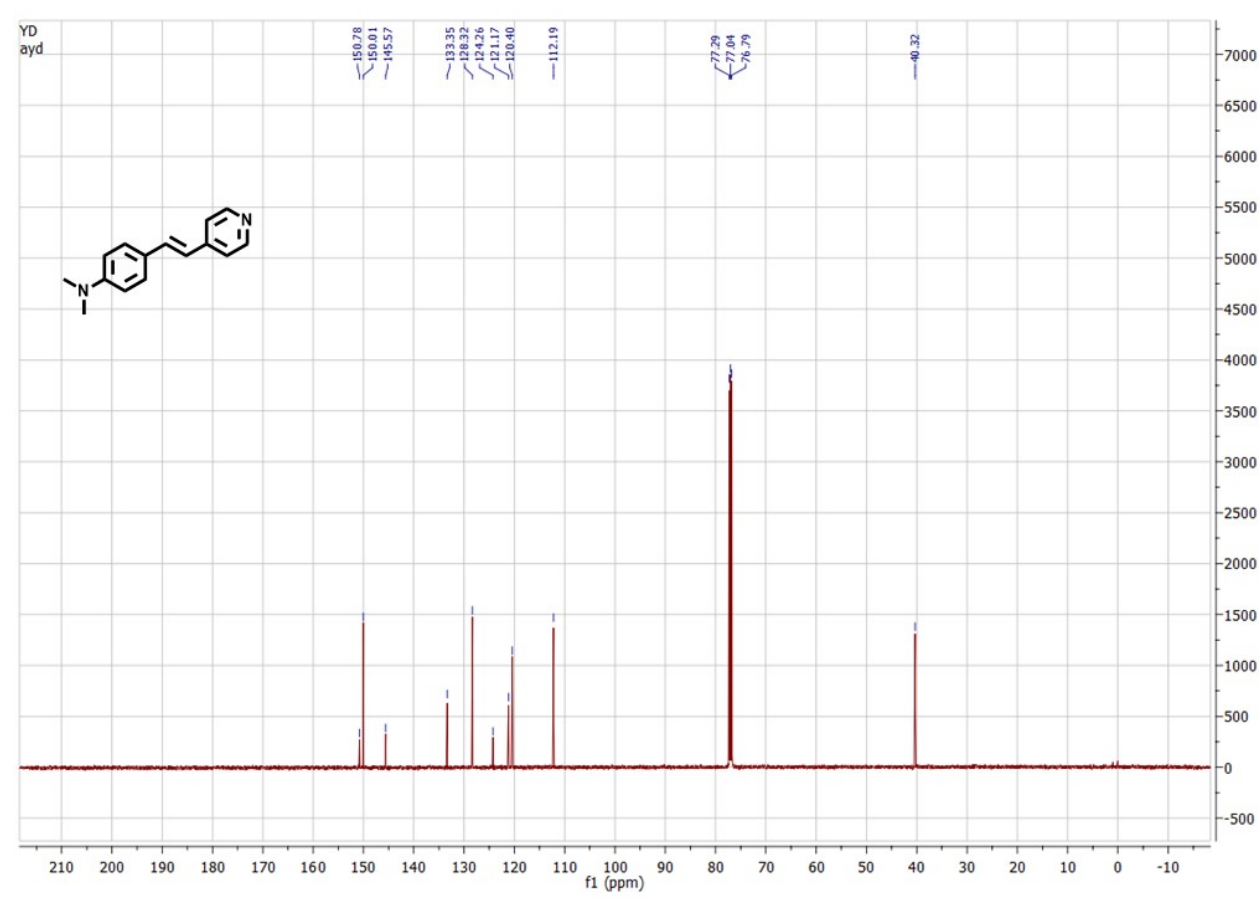

SKG\_G

IITGN\_POS\_14\_JUN\_24\_30 189 (3.687)

1: TOF MS ES+  
4.66e5

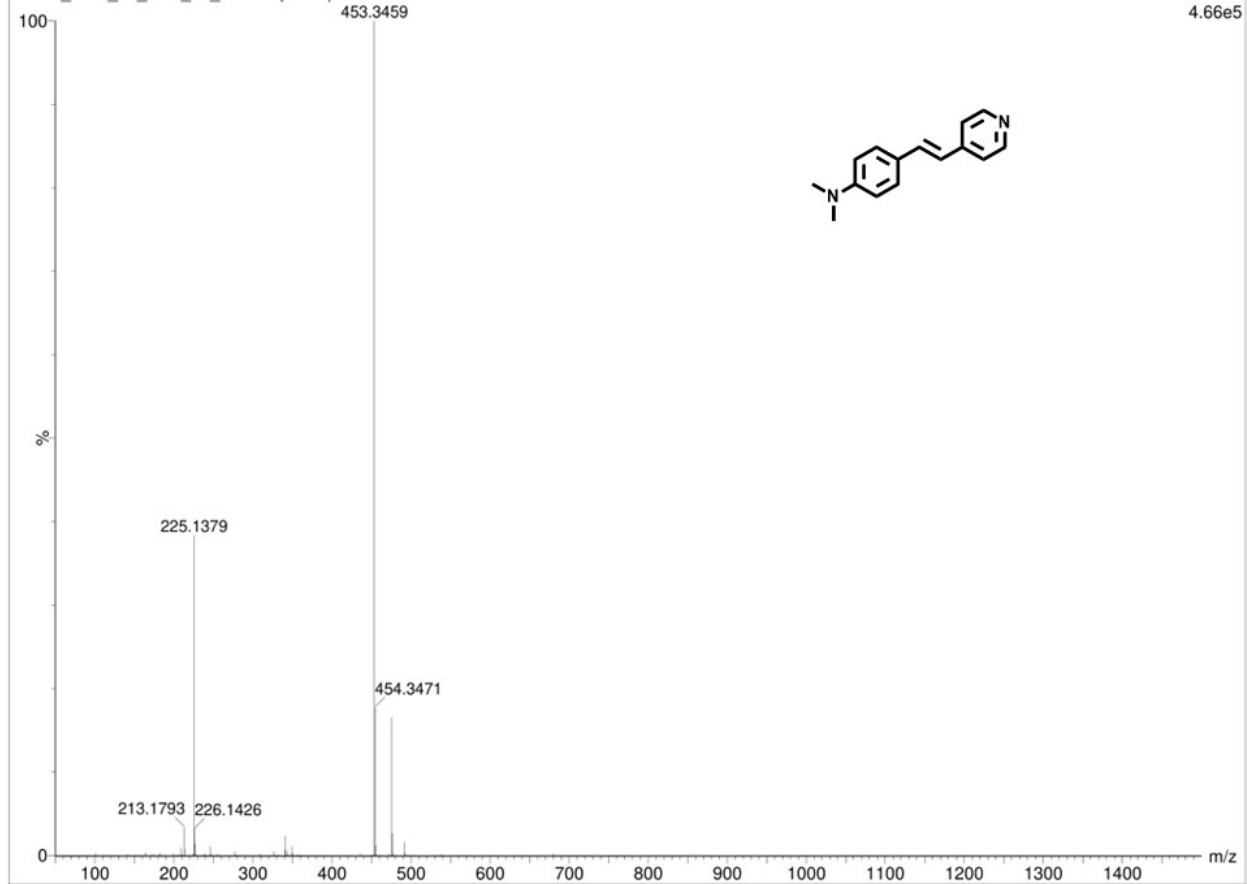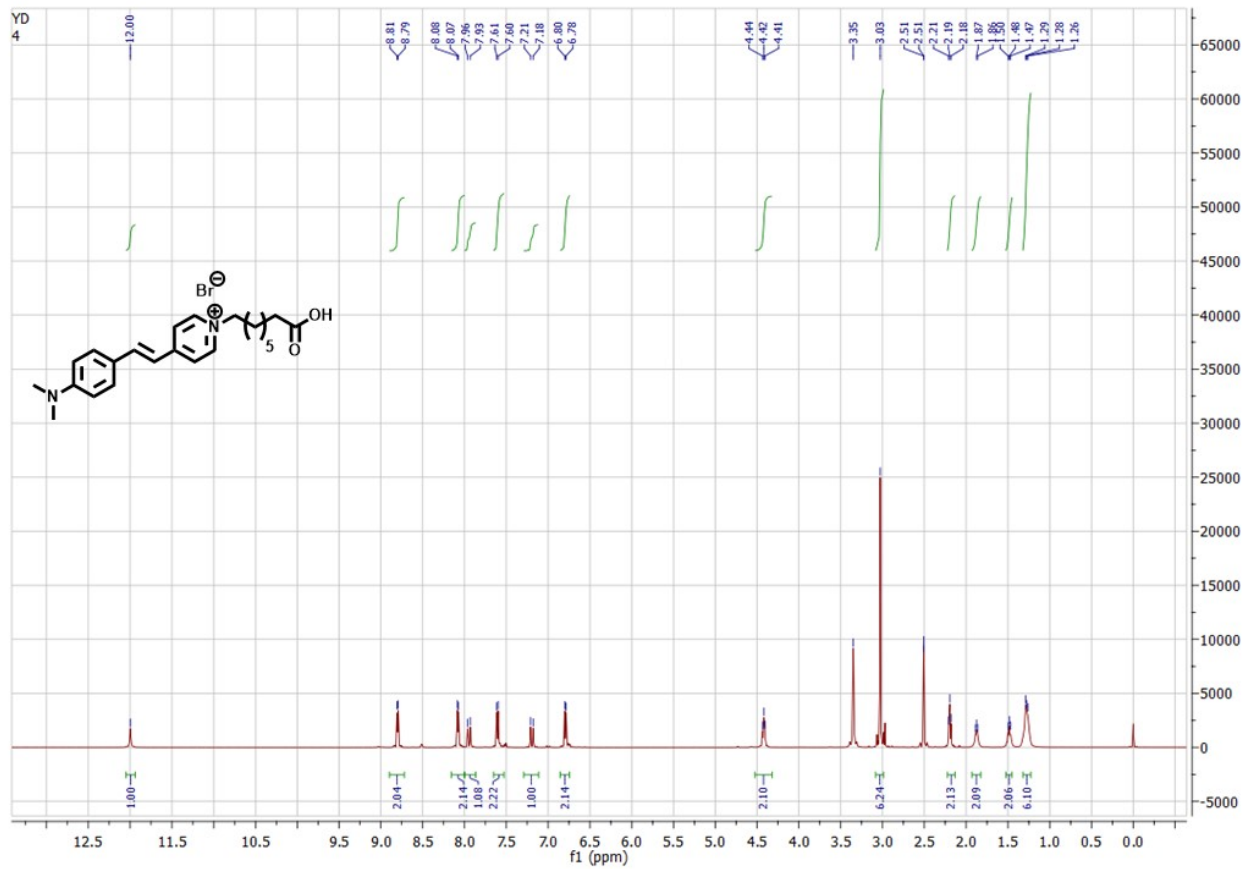

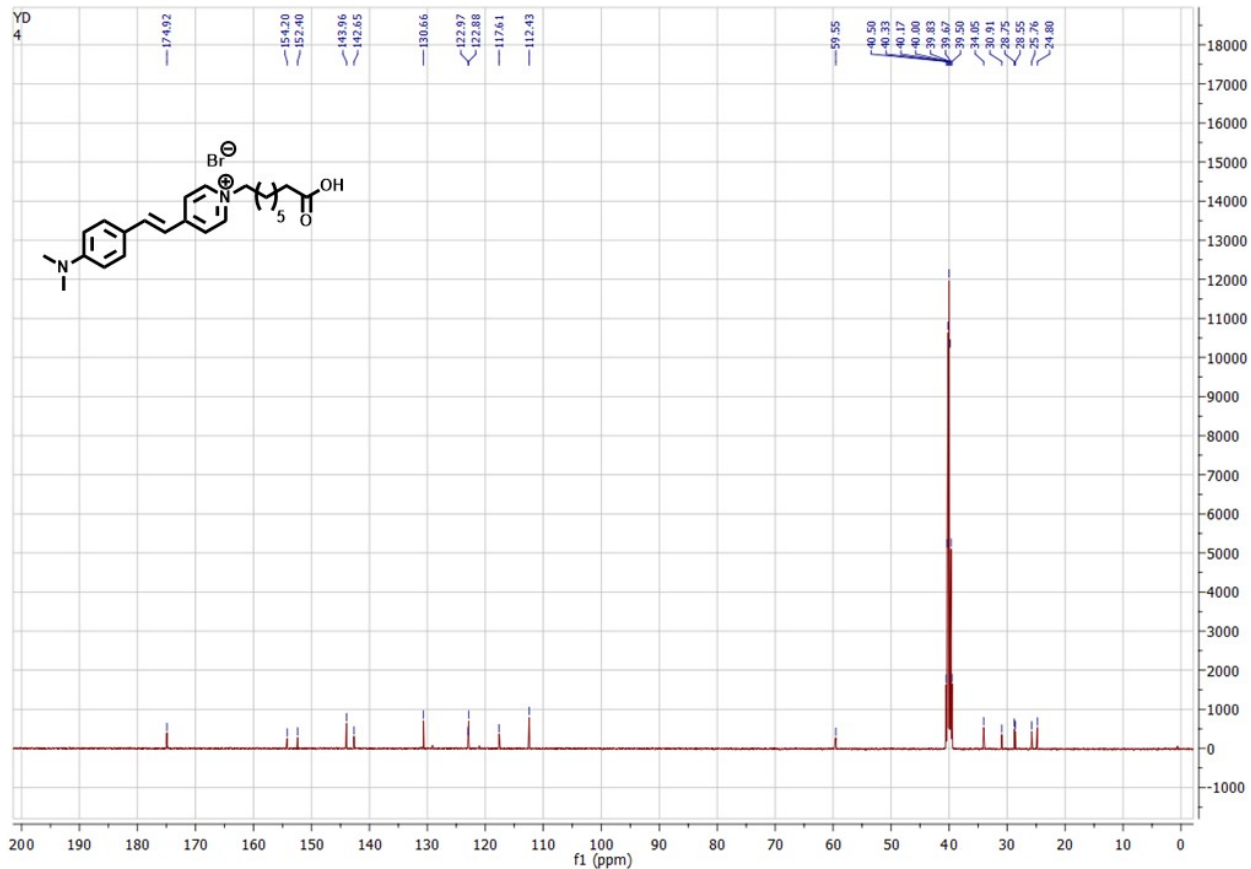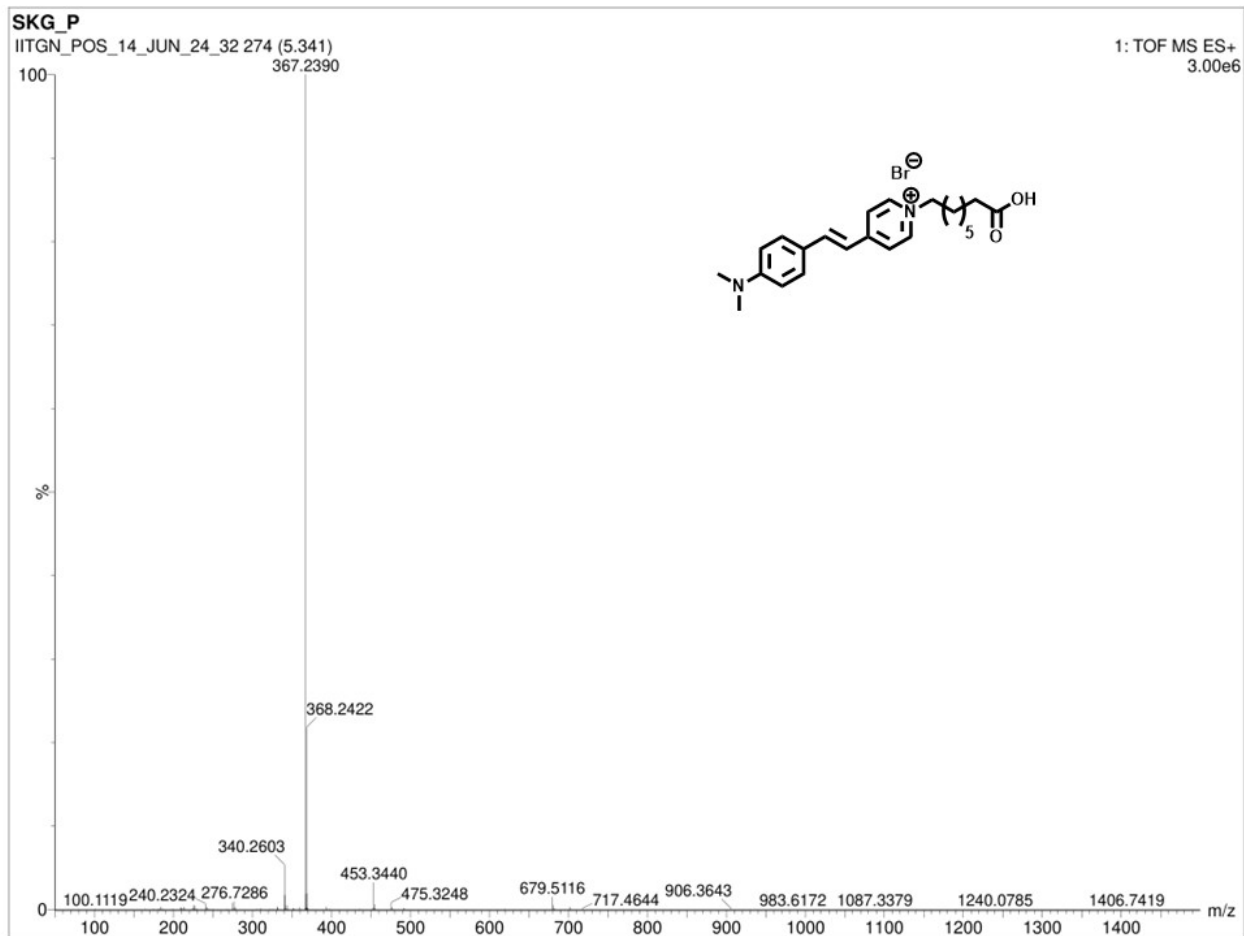

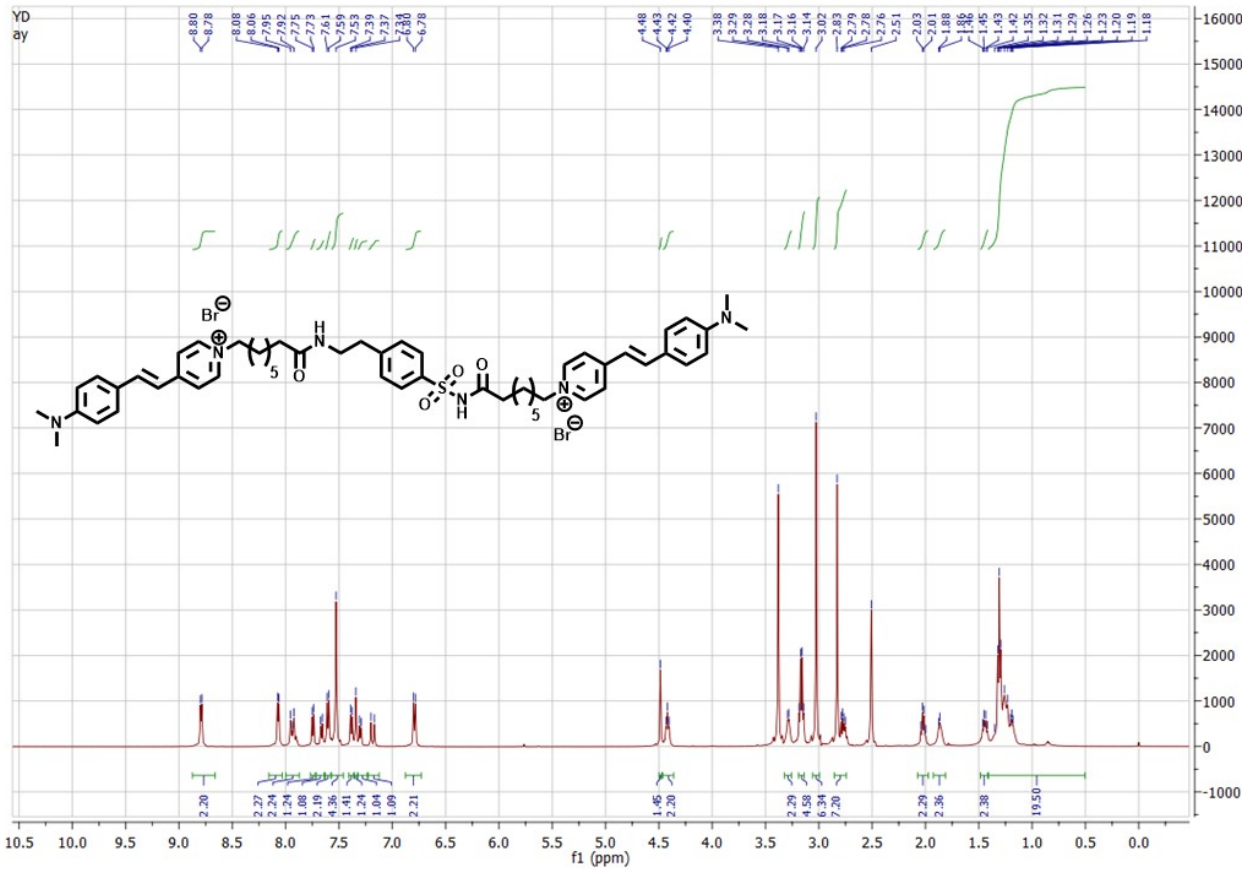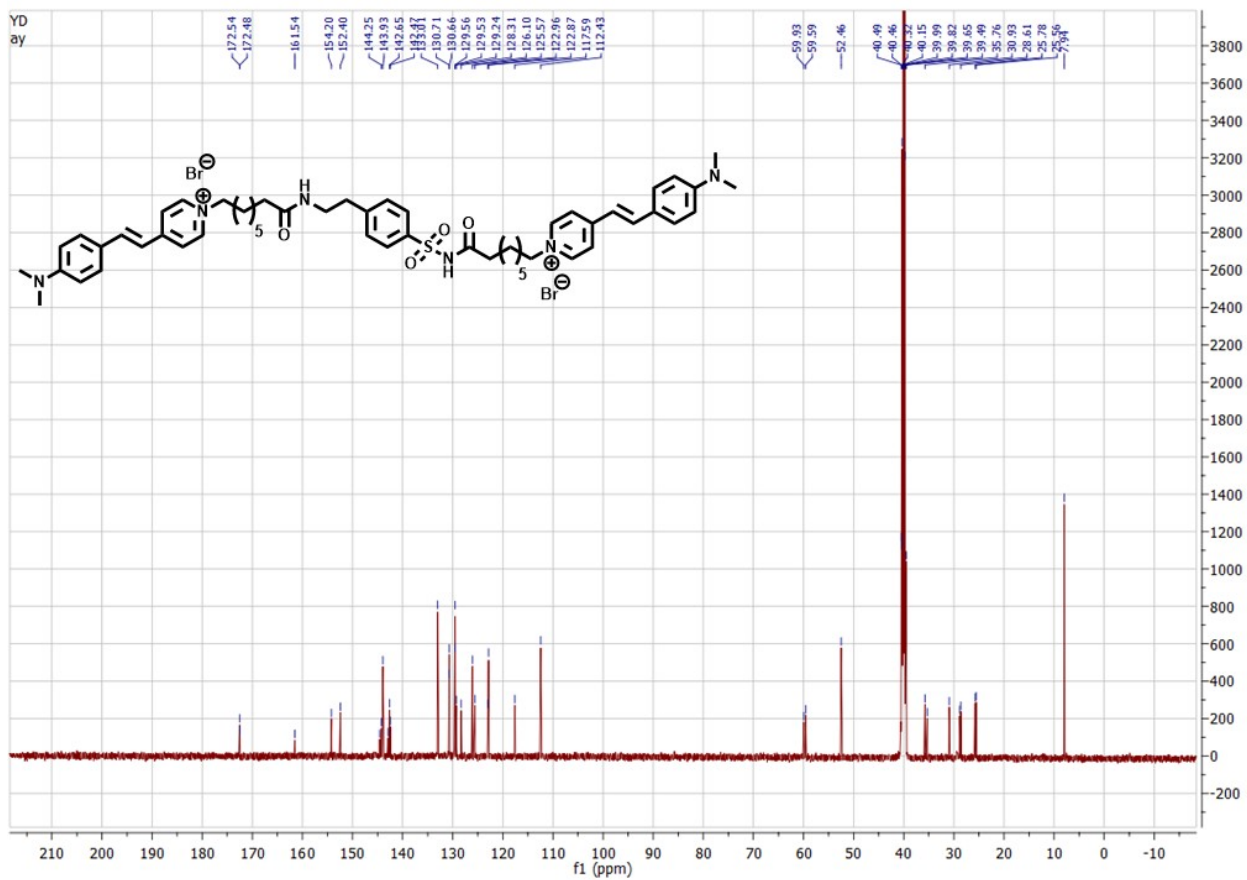

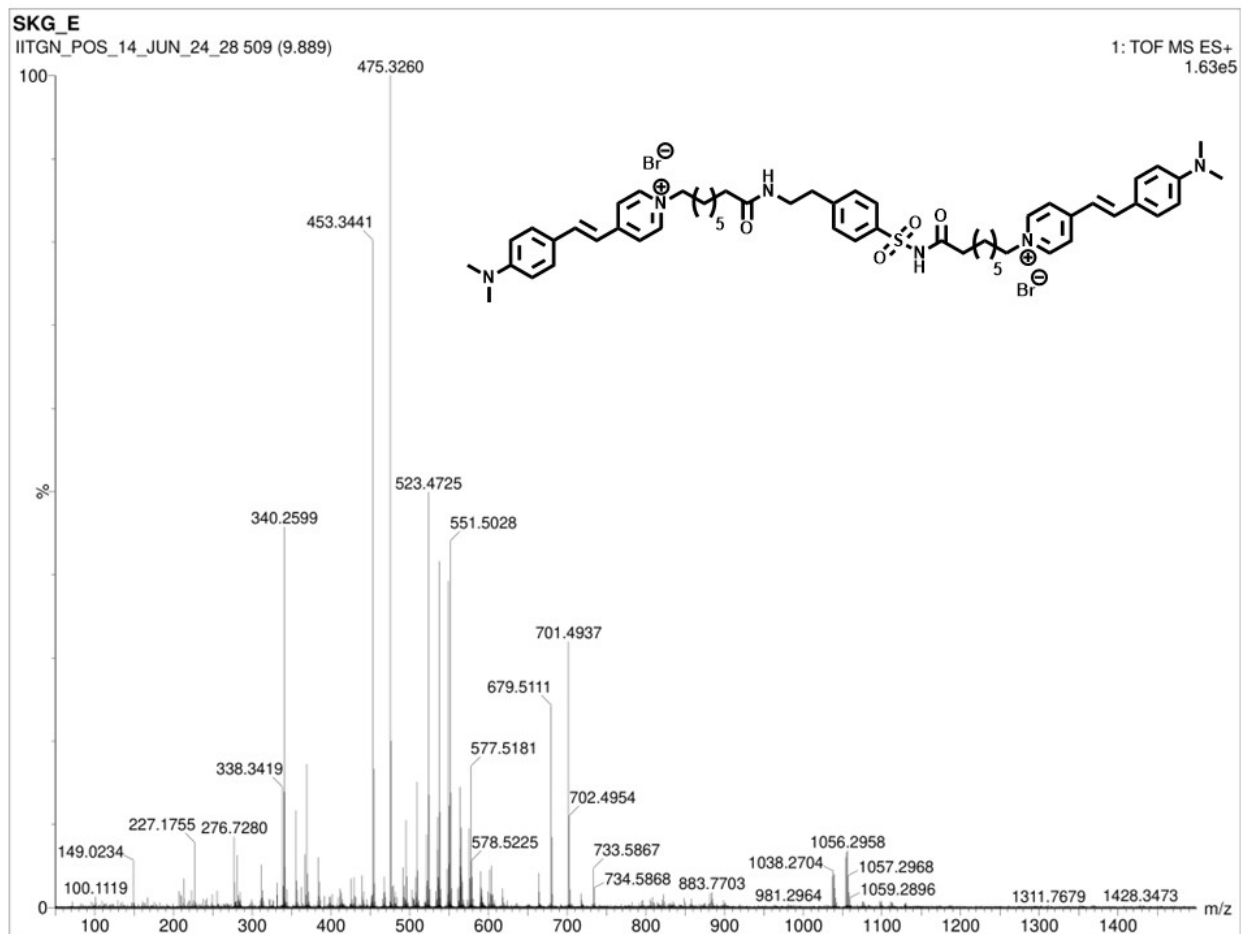

## References

1. Nelson, Grady L., Conor T. Ronayne, Lucas N. Solano, Sravan K. Jonnalagadda, Shirisha Jonnalagadda, Tanner J. Schumacher, Zachary S. Gardner et al, *Bioorganic & Medicinal Chemistry Letters*, 2021, **52**, 128411.
2. James, Samantha N., and Mark J. Coster, *Tetrahedron Letters*, 2015, **56**, 2059-2061.
3. Mukherjee, Tarushyam, M. Aravintha Siva, Komal Bajaj, Virupakshi Soppina, and Sriram Kanvah, *Journal of Photochemistry and Photobiology B: Biology*, 2020, **203**, 111732.
